1 **Global multi-environment resistance QTL for foliar late blight resistance in tetraploid**  
2 **potato with tropical adaptation**

3

4 Hannele Lindqvist-Kreuze\*(ORCID:0000-0002-6523-8824) , Bert de Boeck\*, Paula Unger\*,  
5 Dorcus Gemenet†, Xianping Li‡, Zhechao Pan‡, Qinjun Sui‡, Junhong Qin§, Gebremedhin  
6 Woldegjorgis\*\*, Kassaye Negash\*\*, Ibrahim Seid\*\*, Betaw Hirut††, Manuel Gastelo\*, Jose  
7 De Vega‡‡ (ORCID: 0000-0003-2847-5158), Merideth Bonierbale\*

8

9 \* International Potato Center, CIP, Av. La Molina 1895, 15024 Lima, Peru.

10 †CIP, Kenya c/o ILRI Campus Old Naivasha Road, Uthiru, Nairobi, Kenya

11 ‡Industrial Crops Research Insititute, Yunnan Academy of Agricultural Sciences (YAAS),  
12 Kunming, Yunnan, China.

13 §CIP, China 709 Pan Pacific Plaza, A12 Zhongguancun Nandajie, Beijing 100081 – China

14 \*\*Ethiopian Institute of Agricultural Research, (EIAR), Holetta Agricultural research Center.

15 ††CIP, Ethiopia c/o ILRI Ethiopia P.O. Box 5689, Addis Ababa, Ethiopia

16 ‡‡Earlham Institute (EI), Norwich Research Park, NR4 7UZ, Norwich, UK.

17 MB Present Address: Duquesa Business Centre, P. O. Box 157, Manilva, Malaga, Spain

18 29692.

19

20 **Short running title:** Late blight resistance in tetraploid potato

21 **Keywords:** GWAS, polyploidy, breeding, genotyping by sequencing (GBS), *Phytophthora*  
22 *infestans*

23 **Corresponding author:** Hannele Lindqvist-Kreuze, International Potato Center (CIP),  
24 Apartado 1558, Avenida La Molina 1895, La Molina, Lima, Peru. +51 1 349 6017,  
25 h.lindqvist-kreuze@cgiar.org

26

27 **Abstract** (single paragraph of max 250 words):

28 The identification of environmentally stable and globally predictable resistance to potato late  
29 blight is challenged by the crop's clonal and polyploid nature and the pathogen's rapid  
30 evolution. Genome-wide analysis (GWA) of multi-environment trials can add precision to  
31 breeding for complex traits. A diversity panel of tetraploid potato germplasm bred for multiple  
32 resistance and quality traits was genotyped by genotyping by sequencing (GBS) and  
33 phenotyped for late blight resistance in a trait observation network spanning three continents  
34 addressed by the International Potato Center's (CIP's) breeding program. The aims of this  
35 study were to (i) identify QTL underlying resistance in and across environments and (ii)  
36 develop prediction models to support the global deployment and use of promising resistance  
37 sources in local breeding and variety development programs. Health-indexed *in vitro* plants of  
38 380 clones and varieties were distributed from CIP headquarters in Peru to China and Ethiopia  
39 and tuber seed was produced centrally in each country. Phenotypes were recorded as rAUDPC  
40 following field exposure to local isolates of *Phytophthora infestans*. Stringent filtering for  
41 individual read depth >60 resulted in 3,239 tetraploid SNPs. Meanwhile, 55,748 diploid SNPs  
42 were identified using diploidized data and individual read depth >17. The kinship matrix was  
43 utilized to obtain BLUP and identify best performing germplasm in each and all environments.  
44 Genotypes with high levels of resistance in all environments were identified from the B3,

- 45 LBHT and B3-LTVR populations. GWA identified stable QTL for late blight resistance in  
46 chromosome 9 and environment specific QTL in chromosomes 3, 5, 6 and 10.

## 47 **Introduction**

48 Potato genetic resources comprise a polyploid series consisting of a tremendously diverse  
49 germplasm of wild relatives and cultivated landraces (Spooner 2014; Ovchinnikova et al.,  
50 2011). However, most commercially cultivated potato varieties are tetraploid ( $2n=4x=48$ ) with  
51 the genome consisting mostly of *Solanum tuberosum* Group *tuberosum* with some  
52 introgressions from a few wild species and cultivated landraces (Bradshaw et al., 2006;  
53 reviewed by Bethke et al., 2017; reviewed by Gaiero et al., 2018). Tetraploid potato is a highly  
54 heterozygous, outcrossing autopolyploid, crop which complicates genetic analysis. Most of the  
55 early genetic mapping studies utilized bi-parental populations at the simpler, diploid level  
56 ( $2n=2x=24$ ) and several disease resistance loci were identified in the genome of potato this  
57 way (reviewed by Gebhardt and Valkonen 2001). However, this approach does not permit the  
58 assessment of large gene pools or multi-allelic interactions that influence traits in polyploids.  
59 Significant progress has recently been made in the development of algorithms and software for  
60 genotype calling, linkage and QTL analysis in polyploid species. SNP arrays have been  
61 developed for potato: 8K SolCAP (Hamilton et al., 2011) and the 20K SolSTW arrays (Vos et  
62 al., 2015). These were developed using North American and European potato germplasm,  
63 respectively, and are not consequently the best options for genotyping CIP germplasm since it  
64 contains more introgressions from the native South American gene pool. According to our  
65 previous experience, less than 50% of the SNPs on the 8K SolCAP array were informative in  
66 a test sample of CIP germplasm (Lindqvist-Kreuze et al., 2014). Genotyping by sequencing  
67 (GBS) has been applied to tetraploid potato (Uitdewilligen et al., 2013, Sverrisdottir et al.,  
68 2017); and variant calling from short read sequencing data considering allele dosage is now  
69 possible using several different tools, such as GATK, Freebayes, or SAMtools to name a few  
70 (Clevenger et al., 2015). However, reliable dosage calling in the heterozygous individuals  
71 depends on the read depth in the SNP loci. It was recently demonstrated in autopolyploid

72 blueberry, that a read depth of 61 was adequate to reliably call the allele dosage, while only 17  
73 reads were needed to reliably classify simplex tetraploids as heterozygous with 95% accuracy  
74 (Matias et al., 2019). The identification of QTL in autopolyploids is facilitated by new tools,  
75 such as called GWASpoly that considers allele dosage effects (Rosyara et al., 2016). Together,  
76 these advances make genomic analysis of tetraploid potato more informative and applicable to  
77 evolutionary and breeding studies.

78

79 The goal of CIP potato breeding program is to develop resilient, high yielding, healthy and  
80 early maturing varieties for small-holder farming systems in the developing world. We are  
81 targeting farming systems that usually function with minimum input of pesticides and therefore  
82 a high level of disease resistance is an indispensable trait. To this end, CIP's potato breeding  
83 program has developed breeding populations selected for high levels of resistance to late blight  
84 caused by the oomycete *Phytophthora infestans*, and resistance to Potato Virus Y (PVY), Potato  
85 Virus X (PVX) and Potato Leaf Roll Virus (PLRV). Previous studies have identified genomic  
86 regions in CIP's breeding germplasm explaining resistance to late blight focusing on  
87 phenotypic data collected from field trials in Peru or using local pathogen strains in greenhouse  
88 conditions (Li et al., 2010; Lindqvist-Kreuze et al., 2014, Jiang Rui et al., 2018). Performance  
89 information has been sporadically published about CIP's bred materials in the target regions  
90 where they have been distributed to (Muhinyuza et al., 2015; Hirut et al., 2017b) but to our  
91 knowledge no genetic analysis has been published identifying resistance QTL for resistance in  
92 CIP germplasm tested in environments outside Peru.

93

94 The overall goal of this research was to collect data on the foliar late blight resistance of CIP's  
95 advanced tetraploid potato clones in Ethiopia and China to inform breeding decisions. To  
96 systematically evaluate CIP's breeding materials in diverse target environments we established

97 a trait observation network (TON) of collaborators and assembled a diversity panel that  
98 consists of representative advanced clones (including elite materials) from each of CIP's  
99 breeding populations. This so-called TON panel was then distributed from Peru to China and  
100 Ethiopia, where it was included in a series of trait evaluation experiments by national research  
101 and CIP institutions. The specific aims of this study were to (i) identify QTL underlying  
102 resistance in and across environments and (ii) develop prediction models to support the global  
103 deployment and use of promising resistance sources in local breeding and variety development  
104 programs.

105 We report the genotyping, estimation of linkage disequilibrium and population structure of the  
106 TON panel and identification of QTL for late blight resistance via genome wide association  
107 (GWA). In addition, we present a case for genomics assisted breeding for foliar late blight  
108 resistance and show how the use of genomics and pedigree information can be used to select  
109 best bet clones for breeding and variety development in diverse target environments.

110

## 111 **Materials and methods**

112

### 113 **Germplasm**

114 The TON panel used in this study consisted of 380 genotypes representing seven CIP breeding  
115 populations as well as a group of varieties with variable origins (Table 1.). 'Population A' was  
116 developed at 1980-1990 with emphasis on late blight resistance. Sources of late blight  
117 resistance were improved materials with *S. demissum*-derived resistance from breeding  
118 programs around the world, native Andean cultivars *S. tuberosum* groups *andigena*, *phureja*  
119 and *stenotomun*, wild species *S. acaule* and *S. bulbocastanum*. 'Population B3' genotypes were  
120 derived from 'Population A' with emphasis on increasing frequencies and levels of quantitative  
121 resistance to late blight. The 'B1 population' is derived from *S. tuberosum* group *andigena*.

122 The ‘LTVR population’ is characterized mainly for its resistance to the most important virus  
123 diseases (PVY, PVX and PLRV), short crop duration, and adaptation to warm environments.  
124 The ‘LB-HT’ population combines late blight resistance from the ‘B3 population’ and heat  
125 tolerance from North American and European bred varieties and the LTVR population. ‘B3-  
126 LTVR’ population contains hybrid genotypes originating from crosses between ‘B3’ and  
127 ‘LTVR populations’. The ‘pre-Bred’ population has genotypes that have LB resistance  
128 introduced from wild *Solanum* species into the tetraploid background of ‘B3’ or ‘LTVR’. The  
129 varieties group consists of a group of potato varieties or key breeding lines: ‘Desiree’,  
130 ‘Atlantic’, ‘Spunta’, ‘Granola’, ‘Yungay’, ‘Tomas Condemayta’, ‘DTO-33’, ‘Kufri Yoti’, and  
131 ‘Chucmarina’. CIP numbers and the parentage of the 380 genotypes are given in the  
132 Supplementary Table S1.

133

#### 134 **Environments**

135 The field sites in Ethiopia and China are important potato production areas, while in the field  
136 site in Peru, potato is not the main crop (Table 2). The late blight pathogen populations have  
137 been described in each location. In Peru and Ethiopia only the A1 mating type has been  
138 identified and different clonal lineages are present that frequently contain virulence to most of  
139 the known *S. demissum* *R* genes (Lindqvist-Kreuze et al.; 2019 Mihretu et al., 2019). In contrast  
140 in Southern China A2 mating type has been found dominating (Chen et al., 2017).

141

#### 142 **Field trials**

143 Standard protocols at CIP were utilized for planning and conducting the field trials (Bonierbale,  
144 2007). The statistical designs in each trial are shown Table 2. Uniform tuber seed was produced  
145 centrally in each country following the introduction of *in vitro* plants or mini-tubers from CIP  
146 facilities in Peru or Kenya.

147 Late blight resistance was evaluated under endemic disease pressure. The disease level in the  
148 plots was recorded as ‘percent leaf area infected’ at 7-day intervals until susceptible controls  
149 reached 100% infection. These values were used to calculate the area under the disease progress  
150 curve (AUDPC) and relative AUDPC (rAUDPC). The data was collected and processed using  
151 the HiDAP field book system (<https://research.cip.cgiar.org/gtdms/hidap/>).

152

### 153 **Statistical analysis of phenotypic data**

154 From the weekly observations of the disease incidence in the plots, the AUDPC was calculated  
155 and the estimated means (BLUEs) were transformed to the relative AUDPC (rAUDPC) to  
156 facilitate the comparisons among the different locations. The best linear unbiased predictor  
157 (BLUP) and best linear unbiased estimator (BLUE) and values as well as ranked predictors  
158 were calculated using ASREML package.

159

### 160 **Genotyping, variant calling and filtering for association analysis**

161 In total 380 potato clones were genotyped. Library construction and genotyping by genotyping  
162 by sequencing (GBS) was outsourced to the Genomics Facility at Cornell University in 2015.  
163 The DNA was digested with EcoT221 restriction enzyme and the libraries were 48x  
164 multiplexed for sequencing. The diploid calling was by the service provider using the Tassel  
165 pipeline (Bradbury et al., 2007). The resulting Variant Call Format (VCF) file was processed  
166 with Bcftools (<https://samtools.github.io/bcftools/>) to filter the variants for minimum read  
167 depth (RD) of 17, minimum genotype quality (GQ) of 30, and minor allele frequency (MAF)  
168 0.03. The SNPs that didn’t pass these criteria were changed to missing call, and finally only  
169 the SNP sites that contained less than 30% missing data were selected.

170



171 For polyploid calling the raw FASTQ files were processed with Stacks (Catchen et al., 2013)  
172 to remove the barcodes and with TrimGalore <https://github.com/FelixKrueger/TrimGalore> to  
173 trim the ends of reads. The reads were aligned to the reference genome version *S.*  
174 *tuberosum\_448\_v4.03* (Sharma et al., 2013) using BWA (Li and Durbin, 2009) and the  
175 resulting SAM files were converted to BAM files using Samtools (Li et al., 2009). The variants  
176 were called using GATK HaplotypeCaller option (Poplin et al., 2017), disabling the duplicate  
177 read filter (this is recommended for GBS data) and joint genotyping using the -ERC GVCF  
178 mode. From the VCF files SNP calls were filtered using Bcftools for minimum RD of 61,  
179 minimum GQ of 30 and MAF of 0.03. The samples that didn't pass these criteria were changed  
180 to missing call, and finally only the SNP sites that contained less than 30% missing data were  
181 included in the analysis.

182

### 183 **Analysis of the Population sub-structuring**

184 Population sub-structuring with tetraploid data was done using PolyRAD (Clark et al., 2019).  
185 Only variants in pairwise LD under 0.1 were previously filtered (LD pruning). The diploid  
186 dataset was analyzed using SNPrelate (Zheng et al., 2012) using the subset of bi-allelic SNPs,  
187 filtering for LD (0.2) MAF (<0.03) and missingness (<0.3).

188

### 189 **GWA**

190 Marker trait associations were modelled for all the trials independently and using the diploid  
191 and the tetraploid marker sets with the GWASpoly package (Rosyara et al., 2016). For the  
192 tetraploid dataset *general*, *additive*, *simplex dominant* (1-dom) and *duplex dominant* (2-dom)  
193 models were used while for the diploid dataset *diplo-general*, *diplo-additive*, and the *simplex*  
194 *dominant* (1-dom) model were used. The parameters used for the GWAS modelling function  
195 *GWASpoly* in R were the following: no fixed effects, 4 principal components were included

196 as covariates, a minimum MAF of 0.03 and a maximum genotype frequency (after applying  
197 dominance relations) equal to 0.95 were set, and P3D approximation was used. To detect  
198 statistical significance, the Bonferroni correction method was used, ensuring the genome-wide  
199 type I error is not greater than 0.05. Manhattan plots were generated to display significant SNP  
200 in the different genetic models. In addition, Q-Q plots were used to evaluate the goodness of  
201 fit of the genetic model and the quality of the phenotypic data.

202 The genomic positions of the resulting SNPs associated with plausible QTL for pathogen  
203 resistance in relation to other loci, known genes and QTL, were determined using the *S.*  
204 *tuberosum* Group Phureja DM1-3 516R44 (v4.03) pseudomolecule browser  
205 (<http://solanaceae.plantbiology.msu.edu/>) available from the Potato Genome Sequence  
206 Consortium (PGSC). To obtain an approximate of the physical location of markers for  
207 pathogen resistance present in literature, the position in cM was obtained from the GABI  
208 Primary Database (<https://www.gabipd.org/projects/Pomamo/>) and then “translated” to an  
209 approximate physical position in Mbp using information provided in Sharma et al. (2013) that  
210 integrates the potato genome and physical and genetic maps.

211

## 212 **Results and discussion**

213

### 214 **Population structure**

215 The tetraploid dataset included a total of 305,345 SNPs after the GATK variant calling, while  
216 the diploidized dataset after Tassel pipeline had a SNP count of 312,727. After filtering these  
217 datasets, the Principal component analyses based on 23,804 diploid SNPs and 182,435  
218 tetraploid variants identified no strong population sub-structuring (Figure 1 for the tetraploid  
219 data, Figure S1 for the diploid data) in the diversity panel which makes it an ideal genotype set  
220 for GWA. Only population ‘B1’ separates from the rest most likely because the genetic

221 background of the ‘B1’ population is *S. tuberosum* group *andigena*, while the rest are mostly  
222 group tuberosum type. ‘LB-HT’ shares alleles with the ‘B3’ population, as expected since these  
223 clones are hybrids with B3 clones in their pedigrees. ‘B3’ and ‘LTVR’ population clones are  
224 also mostly separated with a few exceptions of clones that may have been mislabelled. ‘B3-  
225 LTVR’, which is a hybrid between the two populations and this can be clearly seen in the PCA  
226 plot as well. Not surprisingly, Population ‘A’ is intermingled within population ‘B3’ since the  
227 ancestors of the ‘B3’ clones were selected clones of the ‘A’ population.

228

### 229 **SNP sets for GWA**

230 After applying filtering parameters tailored for GWA to all variants in both datasets, the  
231 numbers of SNPs were reduced to 3,239 tetraploid SNPs and 55,748 diploid SNPs. The DP  
232 thresholds were based on the Matias et al. 2019. The study points out, that assuming the GBS  
233 method entails 0.5% allelic error, a minimal RD of 17 is necessary in order to classify simplex  
234 tetraploid calls as heterozygous with a 95% accuracy. To annotate the allele dosage with the  
235 same accuracy, a much higher RD of 61 is needed. Both sets of filtered SNPs were used in the  
236 GWAS to identify trait-linked QTL.

237

### 238 **Linkage disequilibrium**

239 LD decay was estimated using the tetraploid marker set. A spline was fitted on the 90<sup>th</sup>  
240 percentile of the squared correlation coefficient between the alleles in a pair of markers ( $r^2$ )  
241 and the physical distance between these pairs of markers on the “short” distance of up to 10  
242 Mb (Figure 2A) and “long” distance up to 80 Mb (Figure 2B) over all chromosomes. The  
243 intersection of a defined significance threshold of  $r^2=0.1$  and the fitted spline allowed us to  
244 estimate the short distance vs long distance LD decay. On the short distance the threshold is  
245 reached at 2Mb, while on the long distance it is reached at 5.5Mb. Considering the short

246 distance LD-decay estimate of  $r^2_{1/2\max, 90}$ , which was suggested as the most consistent estimator  
247 for LD decay in potato by Vos et al (2017), we obtain the  $r^2_{1/2\max, 90}$  value of 0.55 Mb. This  $r^2_{1/2\max, 90}$   
248 value is equivalent in Vos (2017) data for recent European potato varieties (0.6 Mb)  
249 and a bit lower than the study of Sharma et al., (2018) where the  $r^2_{1/2\max, 90}$  value was 0.91 Mb.  
250 The average  $r^2$  for the short distance in our dataset was 0.091, which is a bit lower than the  
251 average  $r^2$  (0.19-0.22) reported for the European varieties (Vos et al., 2017), indicating that  
252 there were probably more founder haplotypes in our diversity panel than in the European  
253 pooled varieties. The LD decay estimated was moderate, and comparable to the LD decay  
254 found in the European potato germplasm. Estimates based on the average  $r^2$  of the markers  
255 along the short distance suggest that high diversity is retained in the germplasm and that tens  
256 of thousands of markers would be needed to cover the entire tetraploid genome.

257

### 258 **Late blight resistance**

259 There was a high number of genotypes with rAUDPC values comparable to the resistant control  
260 genotype which is released as a variety called Chucmarina in Peru and as Belete in Ethiopia  
261 (Figure 3). Notably, most of the genotypes tested in China were more resistant than the local  
262 variety C-88 that has been popular because of its good late blight resistance.

263 In this research project over 300 advanced tetraploid clones from CIP were shared with  
264 partners, but due to various reasons not all were evaluated in all environments. The genotypes  
265 can only be internationally distributed as *in vitro* plants with a health certificate. After receiving  
266 the plants, there needs to be at least two rounds of multiplication involving either cuttings or  
267 tubers to obtain seed for the replicated trials. However, the performance of all genotyped clones  
268 and their pedigree parents could be estimated in all environments by incorporating the marker  
269 data into the mixed model.

270 The GGE biplot for predicted values (BLUP) and marker-based kinship matrix shows the  
271 performance of the genotypes and some of their parents in all environments (Figure 4). The  
272 most resistant genotypes belong to the B3 and B3-HT populations, while only a few from the  
273 LTVR and B3-LTVR had high level of resistance. From this figure, we evidenced that some  
274 genotypes' resistance to late blight is environment specific, nevertheless several genotypes  
275 show stable resistance across environments. The correlations among environments were high  
276 (Figure 5). Particularly the environment in Peru is highly correlated with all the other  
277 environments suggesting that resistant clones selected in Peru will also likely have good  
278 resistance in these other environments.

279 CIP's breeding strategy defined in the 1990s focused on improving the quantitative resistance  
280 in the B3 population by phenotypic recurrent selection under endemic pressure from the "new  
281 population" of *P. infestans* in the Peruvian Andes supplemented by progeny tests to identify  
282 parents with good general combining ability and eliminate those resulting in segregation for  
283 hypersensitive response against the test isolates. The pathogen population in this area is  
284 dominated by the A1 mating type and EC-1 clonal lineage, which is highly aggressive and  
285 complex in its virulence (Lindqvist-Kreuze et al., 2019). Despite the differences in the  
286 pathogen populations in terms of the mating type and clonal lineages among the countries it  
287 seems that phenotypic selection for late blight resistance in Peru was largely successful and  
288 results transferable across the three environments tested here.

289

### 290 **QTL for late blight resistance**

291 Several SNPs were significantly associated with late blight resistance in the field trials with a  
292 total of 16 markers tagging possible QTL (Table 3 and Table 4). In the tetraploid data, 6  
293 markers for late blight resistance were found in chromosomes III, V and IX while in the diploid  
294 dataset 14 markers on chromosomes 0, III, V, VI, IX and X were associated with the resistance

295 phenotype. Populations of *P. infestans* are diverse and there is a trend of increasing diversity  
296 in potato-growing regions worldwide (Cooke and Lees, 2004). Taking this into account, the  
297 markers on chromosome IX could indicate a QTL for broad resistance not specific to regional  
298 late blight strains, because the QTL was observed in data from trials in Peru and China, while  
299 markers associated to the QTL on chromosomes III, V and VI were found with the data of  
300 unique locations (Table 3 and Table 4). For example, the neighbouring SNPs on chromosome  
301 III, could be indicating a QTL particularly responsible for resistance against late blight strains  
302 specific to Holeta, Ethiopia. On the other hand, the marker on chromosome X found in the  
303 diploidized data could indicate a QTL for broad resistance having been observed in data  
304 collected in Peru as well as in China (Table 4). The highest number of SNPs associated to late  
305 blight resistance in the GWAS were mapped between 59 and 61.2 Mbp of chromosome IX. All  
306 mapped to the end of the long arm of the chromosome, in a region that had been previously  
307 associated with late blight resistance in Peru (Lindqvist-Kreuze et al., 2014). Additionally, the  
308 markers were within or surrounding the segment between 59.3 and 61.0 Mbp that forms a large  
309 cluster of putative resistance genes. For example, the locus PGSC0003DMG400020587  
310 encodes a homolog of *Rpi-vnt1* (Mosquera et al., 2015), a major gene for resistance to *P.*  
311 *infestans* that has been previously cloned and characterized in the wild potato species *Solanum*  
312 *venturii* (Pel et al., 2009; Foster et al., 2009).

313 A few markers for late blight resistance QTL have been found in the past on chromosome III.  
314 These include a QTL tagged between the markers GP25 and CP6 (Gebhardt and Valkonen,  
315 2001) which can be located near the locus PGSC0003DMB000000154 or approx. between 42  
316 and 51 Mbp in the Phureja DM1-3 genome. The SNPs 3\_45458723, 3\_45458753 and  
317 3\_45458754 found in the diploidized dataset mapped close to this QTL. These markers are  
318 located within a WREBP-2 protein / transcription factor IIIA gene  
319 (PGSC0003DMG400009082). Marker 3\_3319097 is localized within a gene encoding an iron

320 binding oxidoreductase (PGSC0003DMG40002252) that is located near an already known  
321 QTL tagged with marker T6135 (Gebhardt and Valkonen, 2001).

322 Several late blight resistance genes originated from *Solanum demissum* have been already  
323 mapped to specific positions of the genome. These include *R1* in chromosome V, *R3*, *R6* and  
324 *R7*, all in the distal segment of chromosome XI and *R2* in chromosome IV. Also, the genes  
325 *Rber* and *Rblc* belonging to other *Solanum* groups have been mapped to chromosomes X and  
326 VIII, respectively. These genes show resistance to contemporary races of *Phytophthora*  
327 *infestans*. Additionally, promising QTL are thought to be located on chromosomes III, IV, V  
328 and VI (Gebhardt and Valkonen 2001). The region with *R1* and QTL for late blight resistance  
329 in chromosome V is flanked by the markers GP21 and GP179 approximately between 2 and 5  
330 Mbp in the DM genome containing the SNPs 5\_4260524 and 5\_5572873 in the tetraploid and  
331 the diploid dataset, respectively (Table 3, 4). The SNP 10\_51544544 found on chromosome X  
332 in the diploid dataset and associated with resistance in three experiments (Table 4), is mapped  
333 to a region associated with late blight resistance conferred by gene *Rber*, tagged by the marker  
334 TG63 is located approximately at 52 Mbp in the DM genome.

335 The SNP 6\_45694949 found on chromosome VI, mapped to a physical position around 45.7  
336 Mbp, is located near a gene and two flanking QTL that have been recently associated with  
337 quantitative late blight resistance. Álvarez et al. (2017) used association mapping to identify  
338 SNPs in genes from a set of candidate genes in *Solanum tuberosum* group Phureja associated  
339 with quantitative resistance. The gene expresses a stem 28 kDa glycoprotein and is located  
340 around 49.1 Mbp between the Ib6a and Pin6b – lb6b QTL. The favourable allele of this SNP  
341 has a significant effect on the resistance in Yunnan in 2015 and 2016, and an additive effect  
342 since the individuals homozygous for the favourable allele are more resistant than the  
343 heterozygous individuals (Figure 6).

344

345 The 48x plex multiplexing of the samples during the sequencing and stringent filtering for  
346 minimum read depth in all samples yielded relatively few SNP (less than 4K), which is too few  
347 considering the level of LD decay-based estimate of 10s of thousands SNP to fully cover the  
348 genome. Therefore, the GWA was done using both tetraploid and the diploidized data. Three of  
349 the markers (9\_58779951, 9\_59967523, 9\_60067335) map in chromosome 9 in the same  
350 chromosome region previously found associated with late blight resistance in Peru (Lindqvist-  
351 Kreuze et al., 2014; Li et al., 2010). These markers are physically separated in the DM genome  
352 by 1.3Mb, which fits the estimate for the LD decay in these potato genotypes. In the QTL  
353 dPI09c reported by Li et al. (2010) the R8 gene originating from *Solanum demissum* was  
354 recently identified (Jian Rui et al., 2018). The QTL dPI09c interval in potato DM1-3 516 R44  
355 (Potato Genome Sequencing Consortium, 2011) begins at 60615044 bp, hence over 600Mbp  
356 away from the nearest GBS marker (9\_60067335) we identified in the current research. In our  
357 tetraploid GBS marker set there are no SNP mapping in the dPI09c interval possibly because  
358 of the low sequencing depth and the complexity of the region that consists of several RXLR  
359 type resistance genes (Jiang Rui et al., 2018). In the diploid marker set, however, four markers  
360 (9\_60067335, 9\_61106174, 9\_61108928, 9\_61261167) that map in the QTL dPI09c interval  
361 were identified.

362

## 363 **Conclusions**

364

365

## 366 **Acknowledgements**

367

368 Funding from GIZ is acknowledged for the project accelerating the Development of Early-  
369 Maturing-Agile Potato for Food Security through a Trait Observation and Discovery Network.



370 This work has also received funding from the CRP-RTB and USAID. Special thanks to  
371 CABANA project funded by Global Challenges Research Fund - part of the UK AID budget,  
372 for funding the secondment of HLK to Earlham Institute (EI) in the UK to conduct the  
373 bioinformatic analysis and to Janet Higgins at EI for the bioinformatics support.

374

375 **Contributions:**

376 Designed experiments and obtained funding: HLK, MB

377 Implemented field trials and collected data: MG, XL, JQ, GW, BH, ZP, QS, KN, IS

378 Analyzed and interpreted data: HLK, DG, BDB, PU

379 Bioinformatics: HLK, JDV, DG

380 Statistics: BDB

381 Wrote the manuscript: HLK, PU, MB

382

383

384

385 **Literature**

- 386 Álvarez M.F., M. Angarita, M.C. Delgado, C. García, J. Jiménez-Gomez, C. Gebhardt and T.  
387 Mosquera. “Identification of Novel Associations of Candidate Genes with Resistance to Late  
388 Blight in Solanum tuberosum Group Phureja.” *Front. Plant Sci.* (2017) 8:1040.  
389
- 390 Bethke, P.C., Halterman, D.A. and Jansky, S., 2017. Are we getting better at using wild potato  
391 species in light of new tools?. *Crop Science*, 57(3), pp.1241-1258.  
392
- 393 Bonierbale, M. *Procedures for standard evaluation trials of advanced potato clones. An*  
394 *international cooperator's guide*. International Potato Center, 2007.  
395
- 396 Bradbury, P.J., Zhang, Z., Kroon, D.E., Casstevens, T.M., Ramdoss, Y., Buckler, E.S. (2007)  
397 TASSEL: Software for association mapping of complex traits in diverse samples.  
398 *Bioinformatics* 23:2633-2635.  
399
- 400 Bradshaw, J.E., Bryan, G.J. and Ramsay, G., 2006. Genetic resources (including wild and  
401 cultivated Solanum species) and progress in their utilisation in potato breeding. *Potato*  
402 *Research*, 49(1), pp.49-65.  
403
- 404 Catchen, J., Hohenlohe, P., Bassham, S., Amores, A., and Cresko, W. Stacks: an analysis tool  
405 set for population genomics. *Molecular Ecology*. 2013.  
406
- 407 Chao, J.F., Chao Huo, Zhechao Pan, Zhijian Zhao, and Qijun Sui. “Study and application of  
408 potato late blight monitoring and contro in southwest China”,in *Chinese potato essays 2017*,  
409 Harbin Cartographic Publishing House 456-461(in Chinese)

410 Clark, Lindsay V., Alexander E. Lipka, and Erik J. Sacks. "polyRAD: Genotype calling with  
411 uncertainty from sequencing data in polyploids and diploids." *G3: Genes, Genomes,  
412 Genetics* 9, no. 3 (2019): 663-673.

413

414 Clevenger, Josh, Carolina Chavarro, Stephanie A. Pearl, Peggy Ozias-Akins, and Scott A.  
415 Jackson. "Single nucleotide polymorphism identification in polyploids: a review, example, and  
416 recommendations." *Molecular plant* 8, no. 6 (2015): 831-846.

417

418 Cooke D.E.L. and A.K. Lees. "Markers, old and new, for examining *Phytophthora infestans*  
419 diversity." *Plant Pathology*. (2004) 53:6.

420

421 Foster SJ, Park TH, Pel M, Brigneti G, Śliwka J, Jagger L, van der Vossen E, Jones JD. Rpi-  
422 vnt1. 1, a Tm-22 homolog from *Solanum venturii*, confers resistance to potato late blight.  
423 *Molecular plant-microbe interactions*. 2009 May;22(5):589-600.

424

425 Gaiero, P., Speranza, P. and de Jong, H., 2018. Introgressive Hybridization in Potato Revealed  
426 by Novel Cytogenetic and Genomic Technologies. *American Journal of Potato Research*,  
427 95(6), pp.607-621.

428

429 Gebhardt, C. and Valkonen, J.P., 2001. Organization of genes controlling disease resistance in  
430 the potato genome. *Annual review of phytopathology*, 39(1), pp.79-102.

431

432 Hamilton, John P., Candice N. Hansey, Brett R. Whitty, Kevin Stoffel, Alicia N. Massa, Allen  
433 Van Deynze, Walter S. De Jong, David S. Douches, and C. Robin Buell. "Single nucleotide

434 polymorphism discovery in elite North American potato germplasm." *BMC genomics* 12, no.  
435 1 (2011): 302.

436

437 Hirut, Betaw G., Hussein A. Shimelis, Rob Melis, Mengistu Fentahun, and Walter De Jong.  
438 "Yield, Yield-related Traits and Response of Potato Clones to Late Blight Disease, in North-  
439 Western Highlands of Ethiopia." *Journal of Phytopathology* 165, no. 1 (2017): 1-14.

440

441 Hirut, B., Shimelis, H., Fentahun, M., Bonierbale, M., Gastelo, M. and Asfaw, A., 2017.  
442 Combining ability of highland tropic adapted potato for tuber yield and yield components under  
443 drought. *PloS one*, 12(7), p.e0181541.

444

445 Jiang Rui, Jingcai Li, Zhendong Tian, Juan Du, Miles Armstrong, Katie Baker, Joanne Tze-  
446 Yin Lim et al. "Potato late blight field resistance from QTL dPI09c is conferred by the NB-  
447 LRR gene R8." *Journal of experimental botany* 69, no. 7 (2018): 1545-1555.

448

449 Koenker, Roger, Stephen Portnoy, Pin Tian Ng, Achim Zeileis, Philip Grosjean, and Brian D.  
450 Ripley. "Package 'quantreg'." *Cran R-project.org* (2018).

451

452 Li H. and Durbin R. (2009) Fast and accurate short read alignment with Burrows-Wheeler  
453 Transform. *Bioinformatics*, 25:1754-60. [PMID: 19451168]

454

455 Li, Heng, Bob Handsaker, Alec Wysoker, Tim Fennell, Jue Ruan, Nils Homer, Gabor Marth,  
456 Goncalo Abecasis, and Richard Durbin. "The sequence alignment/map format and SAMtools."  
457 *Bioinformatics* 25, no. 16 (2009): 2078-2079.

458

459 Li, Jingcai, Hannele Lindqvist-Kreuze, Zhendong Tian, Jun Liu, Botao Song, Juan Landeo,  
460 Leticia Portal et al. "Conditional QTL underlying resistance to late blight in a diploid potato  
461 population." *Theoretical and applied genetics* 124, no. 7 (2012): 1339-1350.

462

463 Lindqvist-Kreuze, Hannele, Manuel Gastelo, Willmer Perez, Gregory A. Forbes, David de  
464 Koeyer, and Merideth Bonierbale. "Phenotypic stability and genome-wide association study of  
465 late blight resistance in potato genotypes adapted to the tropical  
466 highlands." *Phytopathology* 104, no. 6 (2014): 624-633.

467

468 Lindqvist-Kreuze H, Gamboa S, Izarra M, Pérez W, Correa MY, Astete A, Särkinen T, Cueva  
469 M, Gonzáles P. Population structure and host range of the potato late blight pathogen  
470 *Phytophthora infestans* in Peru spanning two decades. *Plant Pathology*. 2020 Feb;69(2):334-  
471 46.

472

473 Matias, F., Meireles, K., Nagamatsu, S., Barrios, S., do Valle, C., Carazzolle, M., ... &  
474 Endelman, J. (2019). Expected Genotype Quality and Diploidized Marker Data from  
475 Genotyping-by-Sequencing of *Urochloa* spp. Tetraploids. *bioRxiv*, 525618.

476

477 Mihretu E, Mohammad W, Kassa B, Lindqvist-Kreuze H. Virulence Spectrum of *Phytophthora*  
478 *infestans* and Spatial Distribution of Physiological Races in Northwestern Ethiopia. *Ethiopian*  
479 *Journal of Agricultural Sciences*. 2020;30(1):69-85.

480

481 Muhinyuza, J.B., Shimelis, H., Melis, R. et al. Yield Response and Late Blight Reaction of  
482 Potato Genotypes in Rwanda. *Am. J. Potato Res.* 92, 10–22 (2015).

483 <https://doi.org/10.1007/s12230-014-9406-8>

484 Ovchinnikova A, Krylova E, Gavrilenko T, Smekalova T, Zhuk M, Knapp S, Spooner DM.  
485 2011. Taxonomy of cultivated potatoes (*Solanum* section *Petota*: Solanaceae) Bot. J. Linn.  
486 Soc. 165: 107-155  
487  
488 Pel MA, Foster SJ, Park TH, Rietman H, van Arkel G, Jones JD, Van Eck HJ, Jacobsen E,  
489 Visser RG, Van der Vossen EA. Mapping and cloning of late blight resistance genes from  
490 *Solanum venturii* using an interspecific candidate gene approach. Molecular plant-microbe  
491 interactions. 2009 May;22(5):601-15.  
492  
493 Poplin, Ryan, Valentin Ruano-Rubio, Mark A. DePristo, Tim J. Fennell, Mauricio O. Carneiro,  
494 Geraldine A. Van der Auwera, David E. Kling et al. "Scaling accurate genetic variant discovery  
495 to tens of thousands of samples." *BioRxiv* (2017): 201178.  
496 Potato Genome Consortium. "Genome sequence and analysis of the tuber crop potato." *Nature*.  
497 (2011) 475: 189–195.  
498  
499 Rosyara, Umesh R., Walter S. De Jong, David S. Douches, and Jeffrey B. Endelman. "Software  
500 for genome-wide association studies in autopolyploids and its application to potato." *The plant*  
501 *genome* 9, no. 2 (2016).  
502  
503 Sharma, Sanjeev Kumar, Katrin MacKenzie, Karen McLean, Finlay Dale, Steve Daniels, and  
504 Glenn J. Bryan. "Linkage Disequilibrium and Evaluation of Genome-Wide Association  
505 Mapping Models in Tetraploid Potato." *G3: Genes, Genomes, Genetics* 8, no. 10 (2018): 3185-  
506 3202.  
507

- 508 Spooner DM, Ghislain M, Simon R, Jansky SH, Gavrilenko T. 2014. Systematics, diversity,  
509 genetics, and evolution of wild and cultivated potatoes. *Botanical Review* 80: 283–383.  
510
- 511 Sverrisdóttir, Elsa, Stephen Byrne, Ea Høegh Riis Sundmark, Heidi Øllegaard Johnsen, Hanne  
512 Grethe Kirk, Torben Asp, Luc Janss, and Kåre L. Nielsen. "Genomic prediction of starch  
513 content and chipping quality in tetraploid potato using genotyping-by-  
514 sequencing." *Theoretical and Applied Genetics* 130, no. 10 (2017): 2091-2108.  
515
- 516 Uitdewilligen, Jan GAML, Anne-Marie A. Wolters, B. Bjorn, Theo JA Borm, Richard GF  
517 Visser, and Herman J. van Eck. "A next-generation sequencing method for genotyping-by-  
518 sequencing of highly heterozygous autotetraploid potato." *PloS one* 8, no. 5 (2013): e62355.  
519
- 520 Vos, Peter G., Jan GAML Uitdewilligen, Roeland E. Voorrips, Richard GF Visser, and Herman  
521 J. van Eck. "Development and analysis of a 20K SNP array for potato (*Solanum tuberosum*):  
522 an insight into the breeding history." *Theoretical and Applied Genetics* 128, no. 12 (2015):  
523 2387-2401.  
524
- 525 Vos, Peter G., M. João Paulo, Roeland E. Voorrips, Richard GF Visser, Herman J. van Eck,  
526 and Fred A. van Eeuwijk. "Evaluation of LD decay and various LD-decay estimators in  
527 simulated and SNP-array data of tetraploid potato." *Theoretical and Applied Genetics* 130, no.  
528 1 (2017): 123-135.  
529
- 530 Zheng X, Levine D, Shen J, Gogarten S, Laurie C, Weir B (2012). "A High-performance  
531 Computing Toolset for Relatedness and Principal Component Analysis of SNP Data."  
532 *Bioinformatics*, 28(24), 3326-3328. doi: 10.1093/bioinformatics/bts606.

533 **Table 1.** Contribution of CIP breeding populations to the TON diversity panel

534

| <b>Breeding population</b> | <b>Genotypes evaluated</b> | <b>main breeding objective</b>                                                       |
|----------------------------|----------------------------|--------------------------------------------------------------------------------------|
| A                          | 13                         | late blight resistance                                                               |
| B1                         | 11                         | late blight resistance                                                               |
| B3                         | 100                        | late blight resistance                                                               |
| B3-HT                      | 37                         | late blight resistance, heat tolerance                                               |
| B3-LTVR                    | 25                         | Hybrid population combining late blight resistance, heat tolerance, virus resistance |
| LTVR                       | 186                        | virus resistance, heat tolerance, drought tolerance, salinity tolerance              |
| PREBRED                    | 2                          | late blight resistance                                                               |
| VARIETY                    | 6                          | varied                                                                               |
| Grand Total                | 380                        |                                                                                      |

535



536

537 **Table 2.** Description of the phenotypic evaluations involving the TON panel clones.

| Country  | Location                                    | Year | number of genotypes evaluated (statistical design) | checks                                  |
|----------|---------------------------------------------|------|----------------------------------------------------|-----------------------------------------|
| Peru     | Pasco, Oxapampa<br>10.5853°S,<br>75.4053°W  | 2014 | 241 (RCBD)                                         | Chucmarina<br>Unica<br>Tomas<br>Desiree |
| China    | Yunnan, Kunming<br>24.8801°N,<br>102.8329°E | 2015 | 306 (RCBD)                                         | Chucmarina<br>C-88                      |
|          |                                             | 2016 | 336 (RCBD)                                         | Unica<br>Desiree                        |
| Ethiopia | Oromia, Holetta<br>9.0633°N, 38.4902°E      | 2017 | 60 (RCBD)                                          | Belete<br>Gudene<br>Unica               |
|          |                                             | 2016 | 128 (Augmented)                                    | Gudene<br>Belete<br>Unica<br>Tomas      |

538

539

540 **Table 3.** Markers tagging QTL for late blight resistance with the general, additive and 1-  
541 dominance models of GWASpoly and tetraploid SNP.

| Marker (chromosome followed by position) | Ref  | Alt   | Trait   | Model     | Threshold | Score | Effect |
|------------------------------------------|------|-------|---------|-----------|-----------|-------|--------|
| 0_36073482                               | G    | A     | Oxa2014 | general   | 4.71      | 8.64  | NA     |
|                                          |      |       |         | additive  | 4.78      | 8.64  | -0.18  |
|                                          |      |       |         | 1-dom-alt | 4.71      | 8.64  | -0.18  |
|                                          |      |       | Yun2015 | general   | 4.74      | 20.21 | NA     |
|                                          |      |       |         | additive  | 4.78      | 20.21 | -0.29  |
|                                          |      |       |         | 1-dom-alt | 4.71      | 20.21 | -0.29  |
|                                          |      |       | Yun2016 | general   | 4.75      | 19.37 | NA     |
|                                          |      |       |         | additive  | 4.78      | 19.37 | -0.25  |
|                                          |      |       |         | 1-dom-alt | 4.71      | 19.37 | -0.25  |
| 3_3319097                                | A    | T     | Hol2017 | general   | 4.49      | 5.83  | NA     |
|                                          |      |       |         | 1-dom-alt | 4.71      | 6.05  | 0.43   |
| 5_4260524                                | A    | T     | Yun2016 | 1-dom-alt | 4.71      | 5.01  | 0.14   |
| 9_58779951                               | G    | A     | Oxa2014 | additive  | 4.78      | 4.84  | -0.11  |
|                                          |      |       |         | 1-dom-alt | 4.71      | 5.52  | -0.13  |
|                                          |      |       |         | Yun2015   | general   | 4.74  | 4.94   |
|                                          |      |       | Yun2015 | 1-dom-alt | 4.71      | 5.92  | -0.14  |
|                                          |      |       |         | Yun2016   | 1-dom-alt | 4.71  | 4.77   |
| 9_59967523                               | A    | T     | Yun2015 | general   | 4.74      | 7.3   | NA     |
|                                          |      |       |         | additive  | 4.78      | 6.94  | -0.14  |
|                                          |      |       |         | 1-dom-alt | 4.71      | 8.18  | -0.17  |
|                                          |      |       | Yun2016 | general   | 4.75      | 7.76  | NA     |
|                                          |      |       |         | additive  | 4.78      | 8.29  | -0.13  |
|                                          |      |       |         | 1-dom-alt | 4.71      | 8.38  | -0.15  |
| 9_60067335                               | A    | G     | Hol2016 | 1-dom-alt | 4.71      | 4.81  | -0.22  |
|                                          |      |       | Oxa2014 | general   | 4.71      | 11.11 | NA     |
|                                          |      |       |         | additive  | 4.78      | 11.64 | -0.2   |
|                                          |      |       |         | 1-dom-alt | 4.71      | 12.1  | -0.21  |
|                                          |      |       | Yun2015 | general   | 4.74      | 19.39 | NA     |
|                                          |      |       |         | additive  | 4.78      | 18.99 | -0.26  |
|                                          |      |       |         | 1-dom-alt | 4.71      | 20.31 | -0.28  |
|                                          |      |       | Yun2016 | general   | 4.75      | 16.53 | NA     |
|                                          |      |       |         | additive  | 4.78      | 17.26 | -0.22  |
| 1-dom-alt                                | 4.71 | 17.59 |         | -0.23     |           |       |        |

542

543

544 **Table 4.** Markers tagging QTL for late blight resistance with the diplo-general, diplo-additive  
545 and 1-dominance models of GWASpoly and diploid SNP.

546

| Marker (chromosome followed by position) | Ref | Alt | Trait   | Model          | Threshold | Score | Effect |
|------------------------------------------|-----|-----|---------|----------------|-----------|-------|--------|
| 0_36073482                               | G   | A   | Oxa2014 | diplo-general  | 6         | 10.27 | NA     |
|                                          |     |     |         | diplo-additive | 6.03      | 10.27 | -0.2   |

|            |   |   |         |                |      |       |       |
|------------|---|---|---------|----------------|------|-------|-------|
|            |   |   |         | 1-dom-alt      | 6.02 | 10.27 | -0.2  |
|            |   |   | Yun2015 | diplo-general  | 6.01 | 25.69 | NA    |
|            |   |   |         | diplo-additive | 6.03 | 25.69 | -0.31 |
|            |   |   |         | 1-dom-alt      | 6.02 | 25.69 | -0.31 |
|            |   |   | Yun2016 | diplo-general  | 6.02 | 25.69 | NA    |
|            |   |   |         | diplo-additive | 6.03 | 25.69 | -0.27 |
|            |   |   |         | 1-dom-alt      | 6.02 | 25.69 | -0.27 |
| 3_45458723 | A | C | Hol2017 | diplo-general  | 5.94 | 25.69 | NA    |
|            |   |   |         | diplo-additive | 6.02 | 25.69 | 0.47  |
|            |   |   |         | 1-dom-alt      | 6.02 | 25.69 | 0.47  |
| 3_45458753 | G | A | Hol2017 | diplo-additive | 6.02 | 25.69 | 0.47  |
|            |   |   |         | 1-diplo-alt    | 6.02 | 25.69 | 0.47  |
| 3_45458754 | A | T | Hol2017 | diplo-additive | 6.02 | 25.69 | 0.47  |
|            |   |   |         | 1-diplo-alt    | 6.02 | 25.69 | 0.47  |
| 5_5572873  | G | A | Oxa2014 | diplo-additive | 6.03 | 25.69 | 0.17  |
|            |   |   |         | 1-diplo-alt    | 6.02 | 25.69 | 0.17  |
| 6_45694949 | G | A | Yun2015 | diplo-general  | 6.01 | 25.69 | NA    |
|            |   |   |         | 1-dom-alt      | 6.02 | 25.69 | -0.15 |
|            |   |   | Yun2016 | diplo-general  | 6.02 | 25.69 | NA    |
|            |   |   |         | 1-dom-alt      | 6.02 | 25.69 | -0.13 |
| 9_58779951 | G | A | Oxa2014 | diplo-general  | 6    | 25.69 | NA    |
|            |   |   |         | diplo-additive | 6.03 | 25.69 | -0.17 |
|            |   |   |         | 1-dom-alt      | 6.02 | 25.69 | -0.17 |
|            |   |   | Yun2015 | diplo-general  | 6.01 | 25.69 | NA    |
|            |   |   |         | diplo-additive | 6.03 | 25.69 | -0.18 |
|            |   |   |         | 1-dom-alt      | 6.02 | 25.69 | -0.18 |
|            |   |   | Yun2016 | diplo-general  | 6.02 | 25.69 | NA    |
|            |   |   |         | diplo-additive | 6.03 | 25.69 | -0.15 |
|            |   |   |         | 1-dom-alt      | 6.02 | 25.69 | -0.15 |
| 9_59967523 | A | T | Oxa2014 | diplo-general  | 6    | 25.69 | NA    |
|            |   |   |         | diplo-additive | 6.03 | 25.69 | -0.14 |
|            |   |   |         | 1-dom-alt      | 6.02 | 25.69 | -0.14 |
|            |   |   | Yun2015 | diplo-general  | 6.01 | 25.69 | NA    |
|            |   |   |         | diplo-additive | 6.03 | 25.69 | -0.21 |
|            |   |   |         | 1-dom-alt      | 6.02 | 25.69 | -0.21 |
|            |   |   | Yun2016 | diplo-general  | 6.02 | 25.69 | NA    |
|            |   |   |         | diplo-additive | 6.03 | 25.69 | -0.19 |
|            |   |   |         | 1-dom-alt      | 6.02 | 25.69 | -0.19 |
| 9_59997331 | T | C | Oxa2014 | diplo-general  | 6    | 25.69 | NA    |
|            |   |   |         | diplo-additive | 6.03 | 25.69 | -0.17 |
|            |   |   |         | 1-dom-alt      | 6.02 | 25.69 | -0.17 |
|            |   |   | Yun2015 | diplo-general  | 6.01 | 25.69 | NA    |
|            |   |   |         | diplo-additive | 6.03 | 25.69 | -0.25 |
|            |   |   |         | 1-dom-alt      | 6.02 | 25.69 | -0.25 |
|            |   |   | Yun2016 | diplo-general  | 6.02 | 25.69 | NA    |
|            |   |   |         | diplo-additive | 6.03 | 25.69 | -0.21 |
|            |   |   |         | 1-dom-alt      | 6.02 | 25.69 | -0.21 |
| 9_60067335 | A | G | Oxa2014 | diplo-general  | 6    | 25.69 | NA    |
|            |   |   |         | diplo-additive | 6.03 | 25.69 | -0.23 |
|            |   |   |         | 1-dom-alt      | 6.02 | 25.69 | -0.23 |
|            |   |   | Yun2015 | diplo-general  | 6.01 | 25.69 | NA    |
|            |   |   |         | diplo-additive | 6.03 | 25.69 | -0.32 |
|            |   |   |         | 1-dom-alt      | 6.02 | 25.69 | -0.32 |
|            |   |   | Yun2016 | diplo-general  | 6.02 | 25.69 | NA    |

|                |                |       |            |                |      |         |               |
|----------------|----------------|-------|------------|----------------|------|---------|---------------|
|                |                |       |            | diplo-additive | 6.03 | 25.69   | -0.26         |
|                |                |       |            | 1-dom-alt      | 6.02 | 25.69   | -0.26         |
| 9_61106174     | C              | T     | Yun2015    | diplo-general  | 6.01 | 25.69   | NA            |
|                |                |       |            | diplo-additive | 6.03 | 25.69   | -0.14         |
|                |                |       |            | 1-dom-alt      | 6.02 | 25.69   | -0.14         |
|                |                |       | Yun2016    | diplo-general  | 6.02 | 25.69   | NA            |
|                |                |       |            | diplo-additive | 6.03 | 25.69   | -0.14         |
|                |                |       |            | 1-dom-alt      | 6.02 | 25.69   | -0.14         |
| 9_61108928     | T              | G     | Oxa2014    | diplo-additive | 6.03 | 25.69   | -0.12         |
|                |                |       |            | 1-dom-alt      | 6.02 | 25.69   | -0.12         |
|                |                |       | Yun2015    | diplo-general  | 6.01 | 25.69   | NA            |
|                |                |       |            | diplo-additive | 6.03 | 25.69   | -0.17         |
|                |                |       |            | 1-dom-alt      | 6.02 | 25.69   | -0.17         |
|                |                |       | Yun2016    | diplo-general  | 6.02 | 25.69   | NA            |
|                |                |       |            | diplo-additive | 6.03 | 25.69   | -0.14         |
|                |                |       |            | 1-dom-alt      | 6.02 | 25.69   | -0.14         |
|                |                |       | 9_61261167 | A              | C    | Oxa2014 | diplo-general |
| diplo-additive | 6.03           | 25.69 |            |                |      |         | -0.21         |
| 1-dom-alt      | 6.02           | 25.69 |            |                |      |         | -0.23         |
| Yun2015        | diplo-general  | 6.01  |            |                |      | 25.69   | NA            |
|                | diplo-additive | 6.03  |            |                |      | 25.69   | -0.3          |
|                | 1-dom-alt      | 6.02  |            |                |      | 25.69   | -0.32         |
| Yun2016        | diplo-general  | 6.02  |            |                |      | 25.69   | NA            |
|                | diplo-additive | 6.03  |            |                |      | 25.69   | -0.25         |
|                | 1-dom-alt      | 6.02  |            |                |      | 25.69   | -0.26         |
| 10_51544544    | A              | G     | Oxa2014    | diplo-general  | 6    | 25.69   | NA            |
|                |                |       |            | diplo-additive | 6.03 | 25.69   | -0.22         |
|                |                |       |            | 1-dom-alt      | 6.02 | 25.69   | -0.22         |
|                |                |       | Yun2015    | diplo-general  | 6.01 | 25.69   | NA            |
|                |                |       |            | diplo-additive | 6.03 | 25.69   | -0.3          |
|                |                |       |            | 1-dom-alt      | 6.02 | 25.69   | -0.3          |
|                |                |       | Yun2016    | diplo-general  | 6.02 | 25.69   | NA            |
|                |                |       |            | diplo-additive | 6.03 | 25.69   | -0.27         |
|                |                |       |            | 1-dom-alt      | 6.02 | 25.69   | -0.27         |

547

548

549

550

551

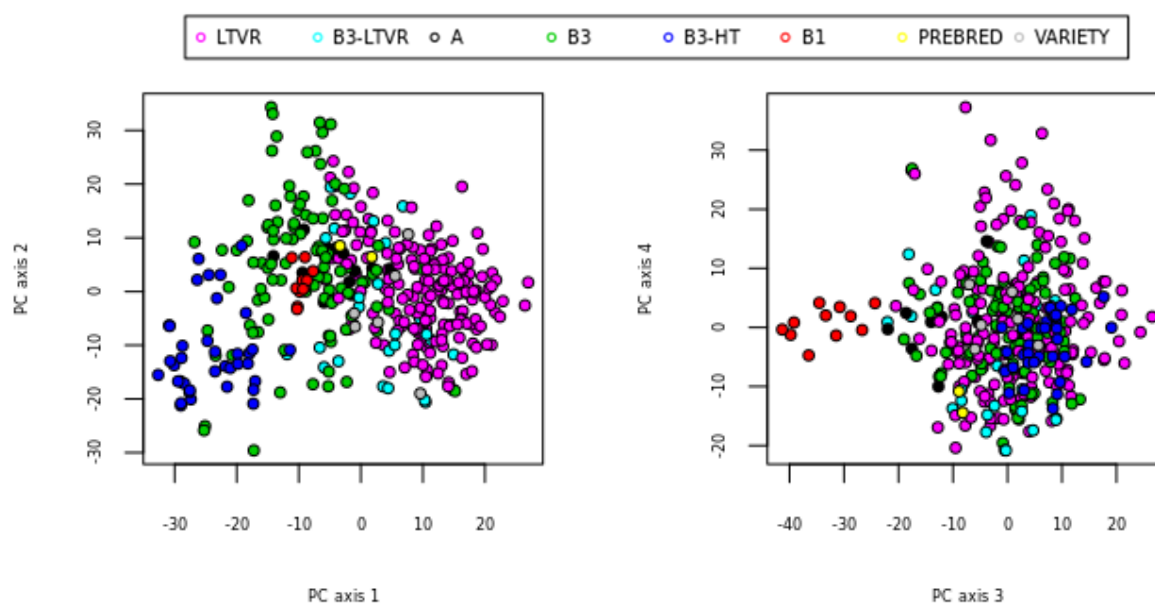

552 **Figure 1.** Population sub-structuring based on polyRAD estimation of genotype probabilities

553

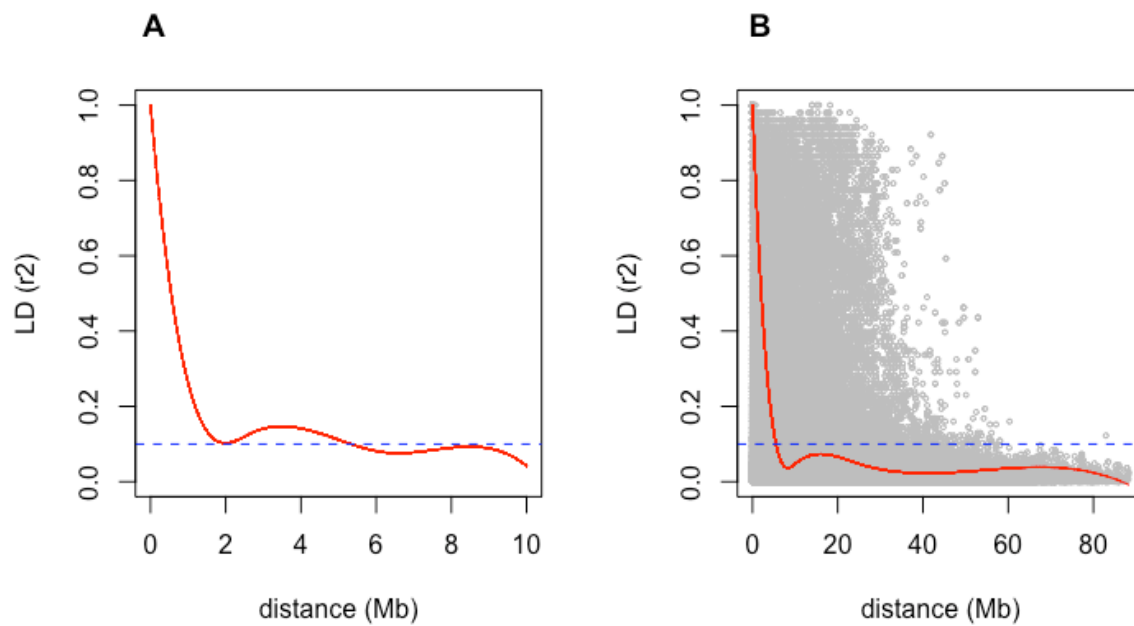

554 **Figure 2.** Linkage disequilibrium (LD) estimated in the TON panel based on Pearson  
555 correlation coefficient ( $r^2$ ) plotted against the physical map distance (Mb) between pairs of  
556 SNP.

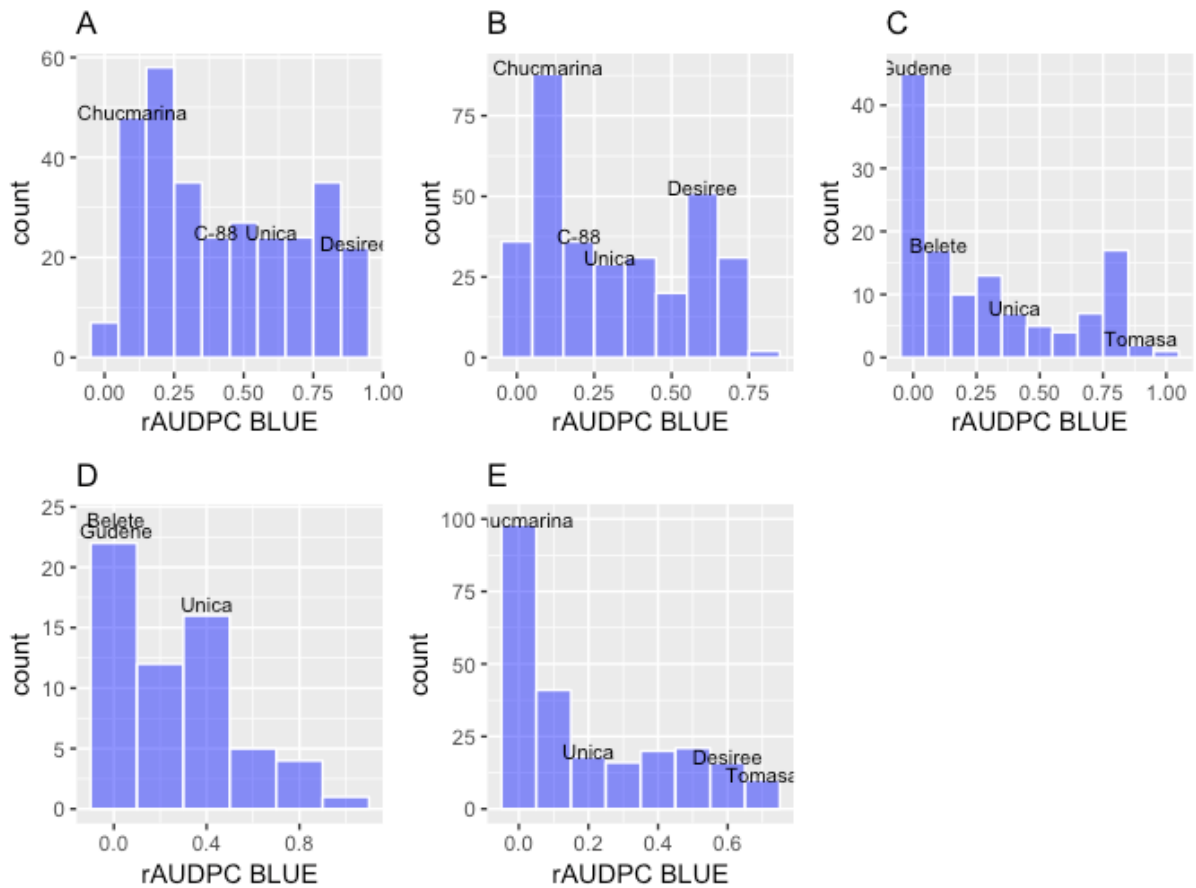

557 **Figure 3.** Histograms of rAUDPC values in Kunming, China in 2015(A) and in 2016 (B),  
558 Holeta, Ethiopia in 2016 (C) and 2017 (D), and Oxapampa, Peru at 2014 (E). The control  
559 genotypes (checks) in each trial are indicated in the plots based on their rAUDPC value.

560

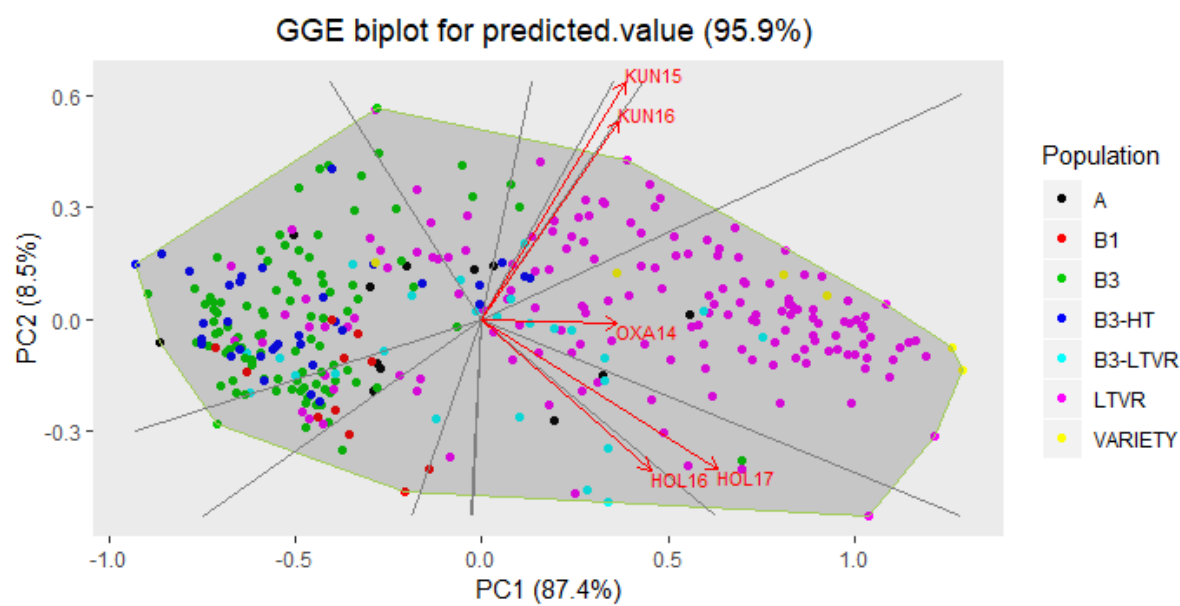

561

562 **Figure 4.** GGE biplot for predicted performance (based on BLUP and genetic kinship matrix)

563 of the test genotypes and their parents in Kunming 2015 (KUN15) and 2016 (KUN16),

564 Oxapampa 2014 (OXA14), Holetta 2016 (HOL16) and 2017 (HOL17).

565



### Correlations of environments for predicted.value

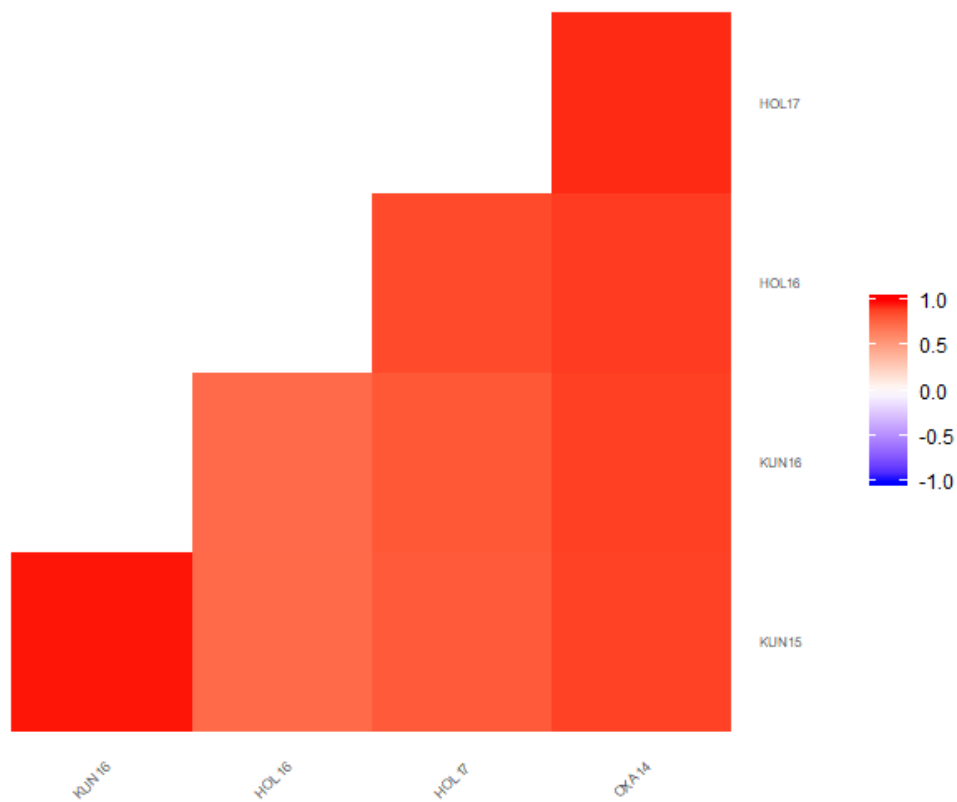

566

567

568

569 **Figure 5.** Heat-plot on the correlations among the different trials.

570

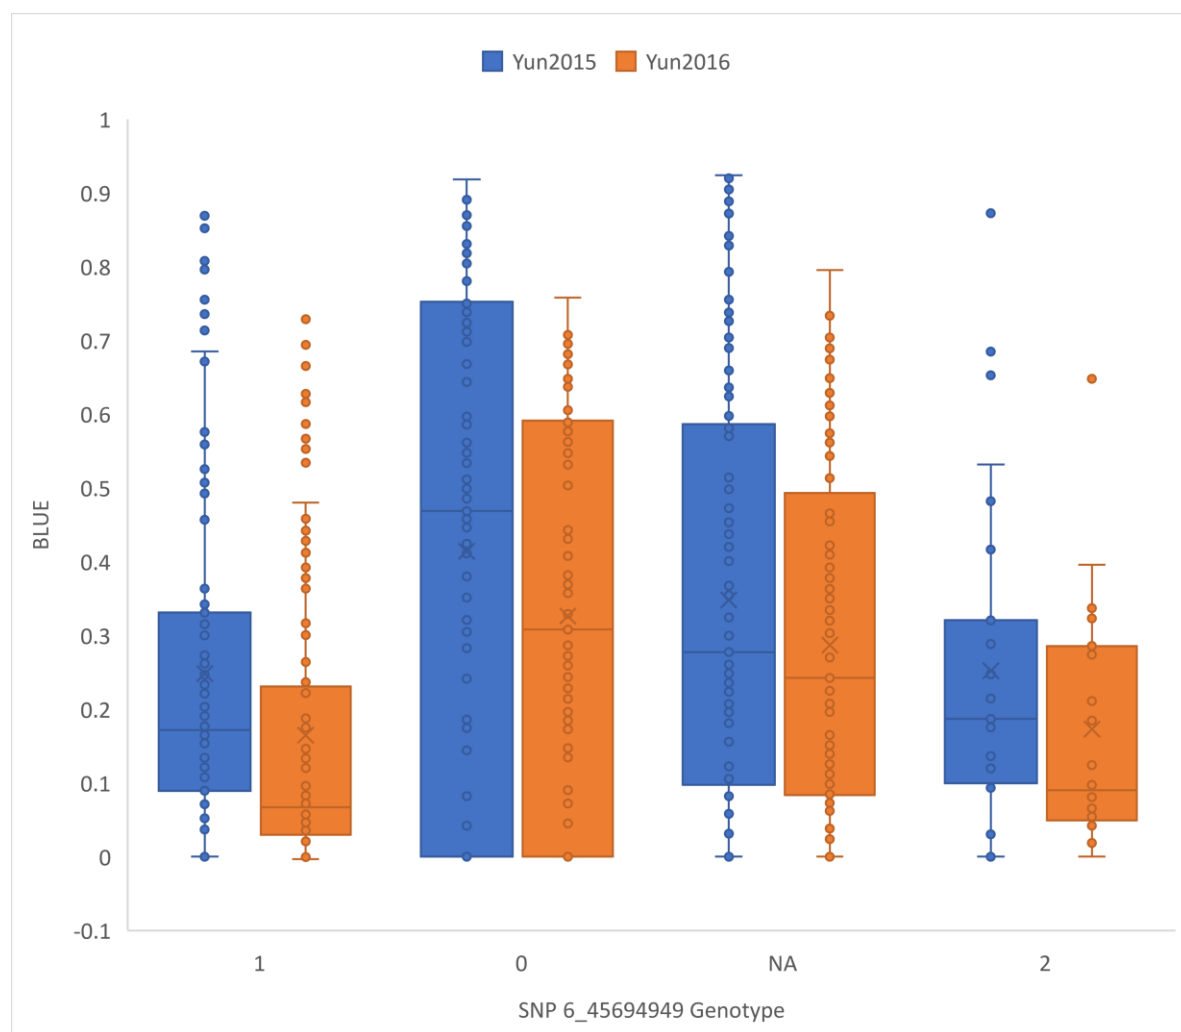

571

572 **Figure 6.** Boxplot for BLUE value distribution in the different genotype classes for the SNP  
573 6\_45694949 found in the diploidized dataset. “0” and “2” stand for homozygous for the  
574 reference and alternative alleles respectively. “1” indicates heterozygote and “NA”, missing  
575 genotype. Lower values indicate a higher resistance.

576

577 **Table S1.** Population denominations, and parentage of the potato genotypes evaluated in this  
 578 study.  
 579

| population | CIP code     | female parent           | male parent                  |
|------------|--------------|-------------------------|------------------------------|
| A          | CIP384866.5  | 376724.1=(85LB70.5)     | BULK PRECOZ                  |
| A          | CIP381379.12 | 378356.895              | PRECOZ BULK                  |
| A          | CIP381381.9  | 378493.915              | PRECOZ BULK                  |
| A          | CIP381381.13 | 378493.915              | PRECOZ BULK                  |
| A          | CIP381403.16 | 378507.833              | BULK                         |
| A          | CIP381178.14 | 378943.565              | PHY BULK                     |
| A          | CIP384321.3  | 380479.15               | BULK 3                       |
| A          | CIP391691.96 | 381381.9                | LB-CUZ.1                     |
| A          | CIP387224.11 | 382121.25               | 676008=(I-1039)              |
| A          | CIP374080.5  | 801013=(MEX 72 =I-1058) | 700764=(Casa Blanca EE-2010) |
| A          | CIP380011.12 | GRETA                   | SEEDLINGS 79 BULK            |
| A          | CIP380496.6  | INDIA-1058 B            | XY BULK                      |
| A          | CIP377744.1  | M-1266-14 MEX           | 374035.1                     |
| B1         | CIP399053.15 | 395230.1                | 395322.11                    |
| B1         | CIP399067.22 | 395257.2                | 395271.6                     |
| B1         | CIP399075.32 | 395266.2=(B1C4046.2)    | 395282.3=(B1C4062.3)         |
| B1         | CIP399075.7  | 395266.2=(B1C4046.2)    | 395282.3=(B1C4062.3)         |
| B1         | CIP399078.11 | 395266.3=(B1C4046.3)    | 395260.8=(B1C4040.8)         |
| B1         | CIP399048.24 | 395272.2                | 395257.6                     |
| B1         | CIP399079.22 | 395274.1                | 395257.6                     |
| B1         | CIP399085.17 | 395296.2=(B1C4076.2)    | 395256.1=(B1C4036.1)         |
| B1         | CIP399085.30 | 395296.2=(B1C4076.2)    | 395256.1=(B1C4036.1)         |
| B1         | CIP399083.4  | 395296.2=(B1C4076.2)    | 395247.1=(B1C4027.1)         |
| B1         | CIP399085.23 | 395296.2=(B1C4076.2)    | 395256.1=(B1C4036.1)         |

|    |               |           |                   |
|----|---------------|-----------|-------------------|
| B3 | CIP389746.2   | 381379.9  | 386614.16=(XY.16) |
| B3 | CIP393220.54  | 381400.22 | 387170.9          |
| B3 | CIP387164.4   | 382171.1  | 575049=(CEW-69-1) |
| B3 | CIP391046.14  | 386209.1  | 387338.3          |
| B3 | CIP391047.34  | 386209.1  | 387338.3          |
| B3 | CIP393228.67  | 386209.1  | 387170.9          |
| B3 | CIP391002.6   | 386209.1  | 386206.4          |
| B3 | CIP393227.66  | 386209.1  | 381400.22         |
| B3 | CIP391583.25  | 386209.15 | 387170.9          |
| B3 | CIP392617.54  | 387002.11 | 387170.9          |
| B3 | CIP393248.55  | 387002.11 | 386614.16=(XY.16) |
| B3 | CIP393242.50  | 387002.11 | 381400.22         |
| B3 | CIP391580.30  | 387002.2  | 387214.9          |
| B3 | CIP393079.4   | 387004.13 | 390357.4          |
| B3 | CIP393079.24  | 387004.13 | 390357.4          |
| B3 | CIP391004.18  | 387004.4  | 386206.4          |
| B3 | CIP393284.39  | 387015.12 | 387170.9          |
| B3 | CIP393073.179 | 387015.13 | 389746.2          |
| B3 | CIP393073.197 | 387015.13 | 389746.2          |
| B3 | CIP393280.82  | 387015.3  | 386316.14=(XY.14) |
| B3 | CIP393280.64  | 387015.3  | 386316.14=(XY.14) |
| B3 | CIP393280.57  | 387015.3  | 386316.14=(XY.14) |
| B3 | CIP391011.17  | 387041.12 | 386206.4          |
| B3 | CIP391585.179 | 387132.2  | 387170.9          |
| B3 | CIP391585.5   | 387132.2  | 387170.9          |
| B3 | CIP392633.64  | 387132.2  | 387334.5          |
| B3 | CIP392634.49  | 387136.14 | 387170.9          |
| B3 | CIP392634.52  | 387136.14 | 387170.9          |
| B3 | CIP392637.10  | 387143.22 | 387170.9          |

|    |               |           |             |
|----|---------------|-----------|-------------|
| B3 | CIP392637.27  | 387143.22 | 387170.9    |
| B3 | CIP392639.34  | 387143.22 | 387334.5    |
| B3 | CIP393339.242 | 387164.4  | SANI IMILLA |
| B3 | CIP393371.157 | 387170.16 | 389746.2    |
| B3 | CIP393371.58  | 387170.16 | 389746.2    |
| B3 | CIP393371.164 | 387170.16 | 389746.2    |
| B3 | CIP393371.159 | 387170.16 | 389746.2    |
| B3 | CIP391058.175 | 387170.16 | 387338.3    |
| B3 | CIP393349.68  | 387170.6  | 387338.3    |
| B3 | CIP392650.12  | 387181.7  | 387170.9    |
| B3 | CIP393382.44  | 387205.5  | 387338.3    |
| B3 | CIP393385.47  | 387231.7  | 387170.9    |
| B3 | CIP393385.39  | 387231.7  | 387170.9    |
| B3 | CIP393399.7   | 387303.71 | 387338.3    |
| B3 | CIP393075.54  | 387315.27 | 389746.2    |
| B3 | CIP393083.2   | 387315.27 | 390357.4    |
| B3 | CIP393084.31  | 387326.27 | 390357.4    |
| B3 | CIP392657.171 | 387341.1  | 387170.9    |
| B3 | CIP392657.8   | 387341.1  | 387170.9    |
| B3 | CIP393077.159 | 387348.2  | 389746.2    |
| B3 | CIP391065.81  | 387348.2  | 387338.3    |
| B3 | CIP393077.54  | 387348.2  | 389746.2    |
| B3 | CIP393085.5   | 387348.2  | 390357.4    |
| B3 | CIP391065.69  | 387348.2  | 387338.3    |
| B3 | CIP396008.104 | 391002.15 | 393382.64   |
| B3 | CIP396004.263 | 391002.6  | 393382.64   |
| B3 | CIP396004.225 | 391002.6  | 393382.64   |
| B3 | CIP396004.337 | 391002.6  | 393382.64   |
| B3 | CIP396012.266 | 391004.1  | 393280.58   |

|    |               |            |           |
|----|---------------|------------|-----------|
| B3 | CIP396009.240 | 391004.4   | 393280.58 |
| B3 | CIP396009.258 | 391004.4   | 393280.58 |
| B3 | CIP395037.107 | 391004.4   | 391679.12 |
| B3 | CIP396018.241 | 391046.14  | 393280.58 |
| B3 | CIP396023.109 | 391047.34  | 393280.57 |
| B3 | CIP396244.12  | 391580.3   | 392633.1  |
| B3 | CIP395077.12  | 391586.109 | 393053.6  |
| B3 | CIP395109.29  | 391589.26  | 393079.4  |
| B3 | CIP395109.34  | 391589.26  | 393079.4  |
| B3 | CIP395112.19  | 391686.15  | 393079.4  |
| B3 | CIP395112.32  | 391686.15  | 393079.4  |
| B3 | CIP395112.6   | 391686.15  | 393079.4  |
| B3 | CIP395112.36  | 391686.15  | 393079.4  |
| B3 | CIP395111.13  | 391686.5   | 393079.4  |
| B3 | CIP396027.205 | 392633.23  | 393382.64 |
| B3 | CIP396026.101 | 392633.4   | 393280.64 |
| B3 | CIP396026.103 | 392633.4   | 393280.64 |
| B3 | CIP395084.9   | 392633.6   | 393053.6  |
| B3 | CIP396031.119 | 392633.64  | 393382.64 |
| B3 | CIP396031.108 | 392633.64  | 393382.64 |
| B3 | CIP396241.4   | 392634.52  | 392626.9  |
| B3 | CIP396033.102 | 392639.53  | 393382.64 |
| B3 | CIP395169.17  | 392652.8   | 391679.12 |
| B3 | CIP396034.268 | 393042.5   | 393280.64 |
| B3 | CIP396034.103 | 393042.5   | 393280.64 |
| B3 | CIP395123.6   | 393046.7   | 393079.4  |
| B3 | CIP396036.201 | 393077.51  | 393382.64 |
| B3 | CIP396038.101 | 393077.54  | 393280.64 |
| B3 | CIP396037.215 | 393077.54  | 393382.64 |

|       |               |            |           |
|-------|---------------|------------|-----------|
| B3    | CIP396038.107 | 393077.54  | 393280.64 |
| B3    | CIP396038.105 | 393077.54  | 393280.64 |
| B3    | CIP395015.6   | 393083.2   | 391679.12 |
| B3    | CIP395017.14  | 393085.13  | 392639.8  |
| B3    | CIP395017.229 | 393085.13  | 392639.8  |
| B3    | CIP395017.242 | 393085.13  | 392639.8  |
| B3    | CIP395017.227 | 393085.13  | 392639.8  |
| B3    | CIP395011.2   | 393085.5   | 392639.8  |
| B3    | CIP395096.2   | 393085.5   | 393053.6  |
| B3    | CIP396240.2   | 393371.58  | 391679.12 |
| B3    | CIP396240.23  | 393371.58  | 391679.12 |
| B3    | CIP396043.226 | 393401.55  | 393280.57 |
| B3    | CIP396046.105 | TXY.4      | 393280.64 |
| B3-HT | CIP398180.612 | 392657.171 | 392633.64 |
| B3-HT | CIP398180.289 | 392657.171 | 392633.64 |
| B3-HT | CIP398180.292 | 392657.171 | 392633.64 |
| B3-HT | CIP398180.253 | 392657.171 | 392633.64 |
| B3-HT | CIP398180.144 | 392657.171 | 392633.64 |
| B3-HT | CIP398193.650 | 393077.54  | 392633.64 |
| B3-HT | CIP398192.213 | 393077.54  | 392633.54 |
| B3-HT | CIP398190.735 | 393077.54  | 392639.2  |
| B3-HT | CIP398190.112 | 393077.54  | 392639.2  |
| B3-HT | CIP398192.41  | 393077.54  | 392633.54 |
| B3-HT | CIP398192.592 | 393077.54  | 392633.54 |
| B3-HT | CIP398190.571 | 393077.54  | 392639.2  |
| B3-HT | CIP398190.615 | 393077.54  | 392639.2  |
| B3-HT | CIP398190.404 | 393077.54  | 392639.2  |
| B3-HT | CIP398190.530 | 393077.54  | 392639.2  |
| B3-HT | CIP398193.553 | 393077.54  | 392633.64 |

|         |               |                     |                     |
|---------|---------------|---------------------|---------------------|
| B3-HT   | CIP398193.158 | 393077.54           | 392633.64           |
| B3-HT   | CIP398190.605 | 393077.54           | 392639.2            |
| B3-HT   | CIP398192.553 | 393077.54           | 392633.54           |
| B3-HT   | CIP398190.200 | 393077.54           | 392639.2            |
| B3-HT   | CIP398190.523 | 393077.54           | 392639.2            |
| B3-HT   | CIP398201.510 | 393242.5            | 392633.64           |
| B3-HT   | CIP398203.509 | 393280.82           | 392633.64           |
| B3-HT   | CIP398098.65  | 393371.58           | 392639.31           |
| B3-HT   | CIP398208.58  | 393371.58           | 392633.64           |
| B3-HT   | CIP398208.33  | 393371.58           | 392633.64           |
| B3-HT   | CIP398098.205 | 393371.58           | 392639.31           |
| B3-HT   | CIP398208.219 | 393371.58           | 392633.64           |
| B3-HT   | CIP398208.670 | 393371.58           | 392633.64           |
| B3-HT   | CIP398098.231 | 393371.58           | 392639.31           |
| B3-HT   | CIP398098.203 | 393371.58           | 392639.31           |
| B3-HT   | CIP398098.570 | 393371.58           | 392639.31           |
| B3-HT   | CIP398208.704 | 393371.58           | 392633.64           |
| B3-HT   | CIP398098.119 | 393371.58           | 392639.31           |
| B3-HT   | CIP398208.29  | 393371.58           | 392633.64           |
| B3-HT   | CIP398208.505 | 393371.58           | 392633.64           |
| B3-HT   | CIP398208.620 | 393371.58           | 392633.64           |
| B3-LTVR | CIP301056.54  | 385205.5            | 393613.2=(TXY.2)    |
| B3-LTVR | CIP301037.85  | 387205.5            | 702853=(LOP-868)    |
| B3-LTVR | CIP301045.74  | 387205.5            | 391207.2=(LR93.050) |
| B3-LTVR | CIP301024.14  | 388615.22=(C91.640) | 387170.9            |
| B3-LTVR | CIP301024.95  | 388615.22=(C91.640) | 387170.9            |
| B3-LTVR | CIP301026.23  | 389746.2            | BOGNA               |
| B3-LTVR | CIP301041.26  | 389746.2            | LOP-886             |
| B3-LTVR | CIP301055.53  | 389746.2            | 393617.1=(TXY.11)   |



|         |               |                     |                   |
|---------|---------------|---------------------|-------------------|
| B3-LTVR | CIP301023.15  | 391180.6=(C90.266)  | 387170.9          |
| B3-LTVR | CIP301044.36  | 392025.7=(LR93.221) | LOP-886           |
| B3-LTVR | CIP396063.1   | 392633.1            | TXY.12            |
| B3-LTVR | CIP396063.16  | 392633.1            | TXY.12            |
| B3-LTVR | CIP396180.22  | 392633.6            | 393615.6=(TXY.6)  |
| B3-LTVR | CIP396268.9   | 392639.34           | 393613.2=(TXY.2)  |
| B3-LTVR | CIP396272.18  | 392639.34           | TXY.12            |
| B3-LTVR | CIP396268.1   | 392639.34           | 393613.2=(TXY.2)  |
| B3-LTVR | CIP396272.21  | 392639.34           | TXY.12            |
| B3-LTVR | CIP396272.12  | 392639.34           | TXY.12            |
| B3-LTVR | CIP396272.2   | 392639.34           | TXY.12            |
| B3-LTVR | CIP396272.37  | 392639.34           | TXY.12            |
| B3-LTVR | CIP396273.48  | 393220.54           | TXY.12            |
| B3-LTVR | CIP396269.16  | 393371.58           | 393613.2=(TXY.2)  |
| B3-LTVR | CIP396269.14  | 393371.58           | 393613.2=(TXY.2)  |
| B3-LTVR | CIP301029.18  | C97.255             | C95.397           |
| B3-LTVR | CIP301040.63  | UNICA               | 702853=(LOP-868)  |
| LTVR    | CIP394899.5   | 28.68               | C90.205           |
| LTVR    | CIP394898.13  | 28.68               | BWH-87.344R       |
| LTVR    | CIP385558.2   | 32) 2               | NT 91.002         |
| LTVR    | CIP394901.2   | 34.73               | 393617.1=(TXY.11) |
| LTVR    | CIP394900.1   | 34.73               | BWH-87.344R       |
| LTVR    | CIP392285.72  | 36.14               | 382157.3          |
| LTVR    | CIP379706.27  | 377257.1=(LT-1)     | PVX + PVY BULK    |
| LTVR    | CIP388676.1   | 378015.18           | PVY-BK            |
| LTVR    | CIP385561.124 | 38) 8               | ML 91.007         |
| LTVR    | CIP391180.6   | 385305.1=(XY.9)     | 378017.2=(LT-7)   |
| LTVR    | CIP388972.22  | 386316.1=(XY.20)    | 377964.5          |

|      |               |                               |                     |
|------|---------------|-------------------------------|---------------------|
| LTVR | CIP397079.6   | 386768.10=(MARIA<br>TAMBEÃ'A) | 392820.1=(C93.154)  |
| LTVR | CIP397079.26  | 386768.10=(MARIA<br>TAMBEÃ'A) | 392820.1=(C93.154)  |
| LTVR | CIP392797.22  | 387521.3                      | APHRODITE           |
| LTVR | CIP303381.30  | 388611.22=(C91.612)           | 676008=(I-1039)     |
| LTVR | CIP395434.1   | 388611.22=(C91.612)           | N93.067             |
| LTVR | CIP394600.52  | 388611.22=(C91.612)           | 388972.22=(C89.315) |
| LTVR | CIP395192.1   | 388611.22=(C91.612)           | C92.044             |
| LTVR | CIP395195.7   | 388611.22=(C91.612)           | C92.167             |
| LTVR | CIP397044.25  | 388611.22=(C91.612)           | 391180.6=(C90.266)  |
| LTVR | CIP395193.6   | 388611.22=(C91.612)           | C92.030             |
| LTVR | CIP303381.106 | 388611.22=(C91.612)           | 676008=(I-1039)     |
| LTVR | CIP397197.9   | 388615.22=(C91.640)           | 388972.22           |
| LTVR | CIP304345.102 | 388615.22=(C91.640)           | 676008=(I-1039)     |
| LTVR | CIP395432.51  | 388615.22=(C91.640)           | C92.030             |
| LTVR | CIP397039.53  | 388615.22=(C91.640)           | 388972.22=(C89.315) |
| LTVR | CIP395436.8   | 388615.22=(C91.640)           | 388615.22=(C91.640) |
| LTVR | CIP397039.51  | 388615.22=(C91.640)           | 388972.22=(C89.315) |
| LTVR | CIP392759.1   | 388676.1=(Y84.027)            | PENTLAND CROWN      |
| LTVR | CIP397006.18  | 389468.3=(92.119)             | 88.052              |
| LTVR | CIP397067.2   | 390663.8=(C91.628)            | 392820.1=(C93.154)  |
| LTVR | CIP300101.11  | 390674.33=(95.303)            | 387170.9            |
| LTVR | CIP397065.2   | 391180.6=(C90.266)            | 392820.1=(C93.154)  |
| LTVR | CIP397065.28  | 391180.6=(C90.266)            | 392820.1=(C93.154)  |
| LTVR | CIP399101.1   | 391213.1                      | 388972.22           |
| LTVR | CIP300066.11  | 391382.18=(95.108)            | 392820.1=(C93.154)  |
| LTVR | CIP300065.4   | 391382.18=(95.108)            | 387170.9            |
| LTVR | CIP397098.12  | 391533.1=(LR93.060)           | 391207.2=(LR93.050) |

|      |              |                     |                     |
|------|--------------|---------------------|---------------------|
| LTVR | CIP397012.20 | 391846.5=(LR93.309) | 88.052              |
| LTVR | CIP397012.22 | 391846.5=(LR93.309) | 88.052              |
| LTVR | CIP397078.12 | 391846.5=(LR93.309) | 392820.1=(C93.154)  |
| LTVR | CIP393617.1  | 391896.15=(DXY.15)  | DXY.33              |
| LTVR | CIP393613.2  | 391896.15=(DXY.15)  | 391894.7=(DXY.7)    |
| LTVR | CIP396311.1  | 391925.2            | C92.030             |
| LTVR | CIP397036.7  | 392011.1=(LR93.160) | 392745.7=(92.187)   |
| LTVR | CIP397077.16 | 392025.7=(LR93.221) | 392820.1=(C93.154)  |
| LTVR | CIP397014.2  | 392739.4=(92.062)   | 88.108              |
| LTVR | CIP397060.19 | 392739.4=(92.062)   | 392820.1=(C93.154)  |
| LTVR | CIP397196.8  | 392797.22           | 388611.22=(C91.612) |
| LTVR | CIP397196.3  | 392797.22           | 388611.22=(C91.612) |
| LTVR | CIP397069.11 | 392797.22=(C92.140) | 392820.1=(C93.154)  |
| LTVR | CIP397069.5  | 392797.22=(C92.140) | 392820.1=(C93.154)  |
| LTVR | CIP304347.6  | 392820.1=(C93.154)  | 676008=(I-1039)     |
| LTVR | CIP397099.4  | 392822.3=(LR93.073) | 391207.2=(LR93.050) |
| LTVR | CIP397099.6  | 392822.3=(LR93.073) | 391207.2=(LR93.050) |
| LTVR | CIP397073.15 | 392823.4=(LR93.120) | 392820.1=(C93.154)  |
| LTVR | CIP397073.7  | 392823.4=(LR93.120) | 392820.1=(C93.154)  |
| LTVR | CIP397100.9  | 392823.4=(LR93.120) | 391207.2=(LR93.050) |
| LTVR | CIP397073.16 | 392823.4=(LR93.120) | 392820.1=(C93.154)  |
| LTVR | CIP304366.46 | 392823.4=(LR93.120) | 676008=(I-1039)     |
| LTVR | CIP397035.26 | 392823.4=(LR93.120) | 92.187              |
| LTVR | CIP300048.12 | 392973.48=(95.048)  | 392820.1=(C93.154)  |
| LTVR | CIP300046.22 | 392973.48=(95.048)  | 393613.2=(TXY.2)    |
| LTVR | CIP300099.22 | 393533.2=(95.302)   | 392820.1=(C93.154)  |
| LTVR | CIP300063.9  | 393536.13=(95.103)  | 392820.1=(C93.154)  |
| LTVR | CIP300063.4  | 393536.13=(95.103)  | 392820.1=(C93.154)  |
| LTVR | CIP396285.1  | 393617.1=(TXY.11)   | 104.12 LB           |

|      |               |                      |                    |
|------|---------------|----------------------|--------------------|
| LTVR | CIP395448.1   | 393617.1=(TXY.11)    | BWH-87.344R        |
| LTVR | CIP385499.11  | 65-ZA-5              | 377964.5           |
| LTVR | CIP391919.3   | 69.4 (1043) BW       | -                  |
| LTVR | CIP392780.1   | 703364=(SEDAFIN)     | YY.3               |
| LTVR | CIP389468.3   | 720087=(SERRANA)     | 388216.1=(YY.5)    |
| LTVR | CIP390478.9   | 720087=(SERRANA)     | 386287.1=(XY.4)    |
| LTVR | CIP390663.8   | 720087=(SERRANA)     | 386316.14=(XY.14)  |
| LTVR | CIP388611.22  | 720091=(MEX-32)      | 385305.1=(XY.9)    |
| LTVR | CIP394904.20  | 720118.1=(37-35A)    | C90.205            |
| LTVR | CIP302498.70  | 720139=(YAGANA-INIA) | 391180.6=(C90.266) |
| LTVR | CIP302499.30  | 720139=(YAGANA-INIA) | 392820.1=(C93.154) |
| LTVR | CIP394611.112 | 780280=(PW-88-6203)  | 676008=(I-1039)    |
| LTVR | CIP304383.41  | 800824=(RED PONTIAC) | 92.187             |
| LTVR | CIP304383.80  | 800824=(RED PONTIAC) | 92.187             |
| LTVR | CIP391724.1   | 800959=(GRANOLA)     | 386316.1=(XY.20)   |
| LTVR | CIP391207.2   | 800959=(GRANOLA)     | 385305.1=(XY.9)    |
| LTVR | CIP392739.4   | 86001                | 386614.16=(XY.16)  |
| LTVR | CIP392740.4   | 87055                | 386614.16=(XY.16)  |
| LTVR | CIP397054.3   | 87059                | 392820.1=(C93.154) |
| LTVR | CIP397055.2   | 88052                | 392820.1=(C93.154) |
| LTVR | CIP392745.7   | 88078                | 386316.1=(XY.20)   |
| LTVR | CIP397029.21  | 92.118               | 92.187             |
| LTVR | CIP397016.7   | 92.119               | 88.108             |
| LTVR | CIP397030.31  | 93.003               | 92.187             |
| LTVR | CIP300054.29  | 95.059               | 392820.1=(C93.154) |
| LTVR | CIP300056.33  | 95.071               | 387170.9           |
| LTVR | CIP300055.32  | 95.071               | 393613.2=(TXY.2)   |
| LTVR | CIP300072.1   | 95.139               | 392820.1=(C93.154) |
| LTVR | CIP300137.31  | 95.187               | 387170.9           |

|      |               |              |                    |
|------|---------------|--------------|--------------------|
| LTVR | CIP300093.14  | 95.206       | 392820.1=(C93.154) |
| LTVR | CIP388615.22  | B-71-240.2   | 386614.16=(XY.16)  |
| LTVR | CIP392781.1   | B71-74-49.12 | 385280.1=(XY.13)   |
| LTVR | CIP394034.65  | B79.638.1    | 676008=(I-1039)    |
| LTVR | CIP394034.7   | B79.638.1    | 676008=(I-1039)    |
| LTVR | CIP394881.8   | B84-606.5    | 386287.1=(XY.4)    |
| LTVR | CIP393536.13  | BEROLINA     | 386287.1=(XY.4)    |
| LTVR | CIP394895.7   | BWH-87.230R  | C90.205            |
| LTVR | CIP391930.1   | BWH-87.338   | SELF               |
| LTVR | CIP395438.1   | BWH-87.344R  | 393617.1=(TXY.11)  |
| LTVR | CIP395445.16  | BWH-87.415   | 391894.7=(DXY.7)   |
| LTVR | CIP394906.6   | BWH-87.420   | C90.205            |
| LTVR | CIP395446.1   | BWH-87.446R  | 393613.2=(TXY.2)   |
| LTVR | CIP395186.6   | C91.902      | C92.032            |
| LTVR | CIP395197.5   | C91.921      | BK-RKN-3           |
| LTVR | CIP398014.2   | C91.923      | N93.107            |
| LTVR | CIP395194.9   | C93.059      | C93.030            |
| LTVR | CIP304350.78  | CHIEFTAIN    | 392820.1=(C93.154) |
| LTVR | CIP304350.95  | CHIEFTAIN    | 392820.1=(C93.154) |
| LTVR | CIP304350.100 | CHIEFTAIN    | 392820.1=(C93.154) |
| LTVR | CIP304349.8   | CHIEFTAIN    | 92.187             |
| LTVR | CIP304350.18  | CHIEFTAIN    | 392820.1=(C93.154) |
| LTVR | CIP304351.109 | CHIEFTAIN    | 676008=(I-1039)    |
| LTVR | CIP304351.31  | CHIEFTAIN    | 676008=(I-1039)    |
| LTVR | CIP304350.118 | CHIEFTAIN    | 392820.1=(C93.154) |
| LTVR | CIP393615.6   | DXY.33       | 391896.15=(DXY.15) |
| LTVR | CIP395196.4   | ES-92.005    | BK-RKN-1           |
| LTVR | CIP391533.1   | G-7445       | 385280.1=(XY.13)   |
| LTVR | CIP394579.36  | KONDOR       | 393615.6=(TXY.6)   |

|      |               |          |                     |
|------|---------------|----------|---------------------|
| LTVR | CIP392973.48  | KRASA    | 385280.1=(XY.13)    |
| LTVR | CIP392025.7   | LINEA 21 | 386614.16=(XY.16)   |
| LTVR | CIP392032.2   | LOTOS    | 385280.1=(XY.13)    |
| LTVR | CIP392822.3   | MARIELA  | YY.1                |
| LTVR | CIP302428.20  | MARIELA  | 392745.7=(92.187)   |
| LTVR | CIP391382.18  | MARIELA  | 386287.1=(XY.4)     |
| LTVR | CIP304369.22  | MARIELA  | 676008=(I-1039)     |
| LTVR | CIP300135.14  | MARIVA   | 392820.1=(C93.154)  |
| LTVR | CIP300135.3   | MARIVA   | 392820.1=(C93.154)  |
| LTVR | CIP304371.67  | MONALISA | 92.187              |
| LTVR | CIP392820.1   | MONALISA | 388216.1=(YY.5)     |
| LTVR | CIP304371.20  | MONALISA | 92.187              |
| LTVR | CIP304371.58  | MONALISA | 92.187              |
| LTVR | CIP392821.1   | PW-31    | 385280.1=(XY.13)    |
| LTVR | CIP390637.1   | PW-31    | 385305.1=(XY.9)     |
| LTVR | CIP393708.31  | PW-31    | 391895.10=(DXY.10)  |
| LTVR | CIP304387.39  | REINHORT | 92.187              |
| LTVR | CIP304387.92  | REINHORT | 92.187              |
| LTVR | CIP304387.17  | REINHORT | 92.187              |
| LTVR | CIP304394.56  | SHEPODY  | 391207.2=(LR93.050) |
| LTVR | CIP304399.5   | SNOWDEN  | 92.187              |
| LTVR | CIP304399.15  | SNOWDEN  | 92.187              |
| LTVR | CIP391931.1   | SR-17.50 | SELF                |
| LTVR | CIP302476.108 | TITIA    | 392745.7=(92.187)   |
| LTVR | CIP394613.139 | TXY.4    | 676008=(I-1039)     |
| LTVR | CIP394613.32  | TXY.4    | 676008=(I-1039)     |
| LTVR | CIP394614.117 | TXY.8    | 676008=(I-1039)     |
| LTVR | CIP394638.3   | TXY.8    | TITIA               |
| LTVR | CIP396287.5   | TXY.8    | 387170.9            |

|      |               |                     |                   |
|------|---------------|---------------------|-------------------|
| LTVR | CIP304405.47  | WA.018              | 676008=(I-1039)   |
| LTVR | CIP304405.42  | WA.018              | 676008=(I-1039)   |
| LTVR | CIP304406.31  | WA.077              | 676008=(I-1039)   |
| LTVR | CIP394223.9   | XY.13               | C-282LM87B        |
| LTVR | CIP394223.19  | XY.13               | C-282LM87B        |
| LTVR | CIP302476.19  | TITIA               | 392745.7=(92.187) |
| LTVR | CIP304330.34  | 391382.18=(95.108)  | 676008=(I-1039)   |
| LTVR | CIP304345.47  | 388615.22=(C91.640) | 676008=(I-1039)   |
| LTVR | CIP304349.110 | CHIEFTAIN           | 92.187            |
| LTVR | CIP304349.4   | CHIEFTAIN           | 92.187            |
| LTVR | CIP304351.15  | CHIEFTAIN           | 676008=(I-1039)   |
| LTVR | CIP304351.9   | CHIEFTAIN           | 676008=(I-1039)   |
| LTVR | CIP309003.11  | 388611.22           | 304387.17         |
| LTVR | CIP309017.101 | 395438.1            | 801088            |
| LTVR | CIP309024.1   | 397036.7            | 392820.1          |
| LTVR | CIP309026.72  | 397036.7            | 801088            |
| LTVR | CIP309028.32  | 397036.7            | 801152            |
| LTVR | CIP309062.106 | 303381.106          | 302499.24         |
| LTVR | CIP309064.42  | 303381.30           | 392797.22         |
| LTVR | CIP309064.76  | 303381.30           | 392797.22         |
| LTVR | CIP309074.123 | 304330.34           | 392745.7          |
| LTVR | CIP309078.56  | 304330.34           | 304356.32         |
| LTVR | CIP309088.120 | 304347.6            | 302499.24         |
| LTVR | CIP309093.50  | 304349.25           | 392820.1          |
| LTVR | CIP309103.85  | 304349.8            | 801152            |
| LTVR | CIP309128.87  | 304368.46           | 304356.32         |
| LTVR | CIP309129.11  | 304368.46           | 304371.19         |
| LTVR | CIP309131.16  | 304387.31           | 392820.1          |
| LTVR | CIP309137.95  | 800258              | 396311.1          |

|                     |              |                       |                                   |
|---------------------|--------------|-----------------------|-----------------------------------|
| LTVR                | CIP380389.1  | BL-1.2                | MURILLO III-80                    |
| LTVR                | CIP720043    | NARANJA               | (KATAHDIN x MANTARO)              |
| LTVR                | CIP720088    | MPI 61.375/23         | B 25.65=(Atleet x Huinkul<br>MAG) |
| PREBRED             | CIP694474.16 | 4x-84.1               | 2x-5.26                           |
| PREBRED             | CIP694474.33 | 4x-84.1               | 2x-5.26                           |
| VARIETY-Tomasa      | CIP720072    | (B 606.37 X KATAHDIN) | (RENACIMIENTO x YANA<br>IMILLA)   |
| VARIETY-Kufri Jyoti | CIP800258    | 3069D (4)             | 2814A (1)                         |
| VARIETY-Atlantic    | CIP800827    | 800823=(WAUSEON)      | B-5141.6                          |
| VARIETY-Spunta      | CIP800923    | BEA                   | USDA X 96.56                      |
| VARIETY-Desiree     | CIP800048    | URGENTA               | DEPESCHE                          |
| VARIETY-DTO-33      | CIP800174    | WISC 639              | W5295.7                           |

580

581
